# Supplementary material for: Dielectric elastomer actuators with increased dielectric permittivity and low leakage current capable of suppressing electromechanical instability
Source: Royal Society of Chemistry journal article supplement (doi:10.1039/c7tc05562e), 2018-01-01
Supplement: c7tc05562e4.pdf [file c7tc05562e4.pdf]

## Supporting Information

### Dielectric elastomer actuators with increased dielectric permittivity and low leakage current capable of overcoming electromechanical instability

Philip Caspari, Simon J. Dünki, Frank A. Nüesch, Dorina M. Opris\*

P. Caspari, Dr. S. J. Dünki, Prof. F. Nüesch, Dr. D. M. Opris

Swiss Federal Laboratories for Materials Science and Technology Empa, Laboratory for Functional Polymers, Überlandstr. 129, CH-8600, Dübendorf, Switzerland

E-mail: dorina.opris@empa.ch

P. Caspari, Dr. S. J. Dünki, Prof. F. A. Nüesch

École Polytechnique Fédérale de Lausanne (EPFL), Institut des matériaux, Station 12, CH 1015, Lausanne, Switzerland

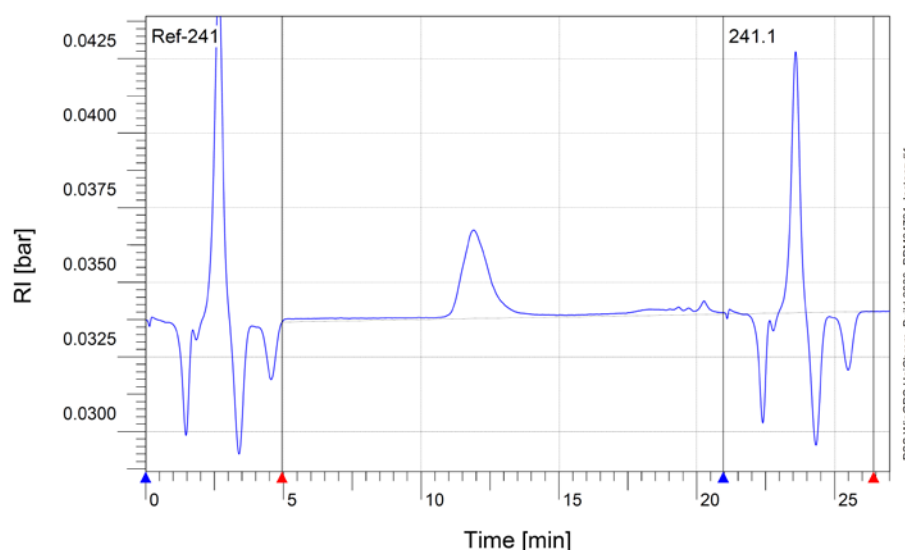

Probe : Ref-241  
Basislinie von : 4.950 ml  
Integration von : 4.917 ml  
Kalibration : PDMS\_THF\_alteSäule\_31012014.cal  
MHK - A (Kal.): 0.000E+0  
Int.Stand.-K : 23.429 ml  
Pumpe : PSS SECcurity  
Konzentration : 2.000 g/l  
Säule 1 : PSS SDV 5µm  
Säule 2 : PSS SDV 5µm  
Detektor 1 : PSS SECcurity UV  
Detektor 2 : PSS SECcurity UV  
Detektor 3 : PSS SECcurity RI  
Operateur : Beatrice Fischer

Methode : C:\EmpaDaten\Methoden\TFE\_Fischer\_01\_2014.  
bis : 26.417 ml  
bis : 26.242 ml  
Eluent : THF  
MHK - K (Kal.): 1.000E+0 ml/g  
Int.Stand.-M : 23.585 ml  
Flußrate : 1.000 ml/min  
Injektvolumen : 20.000 µl  
Temperatur : 30.000 °C  
Temperatur : 30.000 °C  
Versatz : 0.000 ml  
Versatz : 0.160 ml  
Versatz : 0.000 ml  
Messintervall : 1.000 sec

**Figure S1.** GPC elution curve of **P0**.

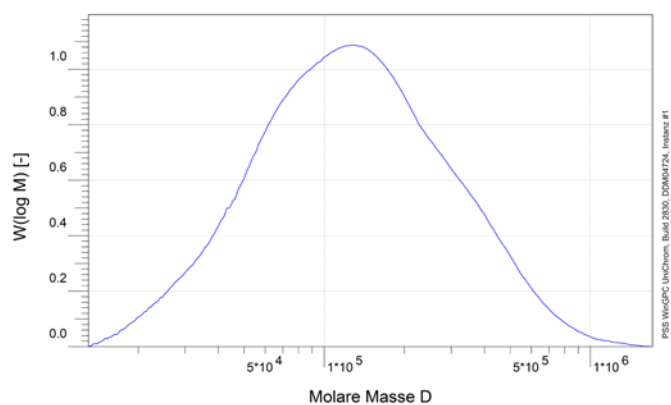

|                   |                                 |                     |               |
|-------------------|---------------------------------|---------------------|---------------|
| Probe :           | Ref-241                         |                     |               |
| Integration von : | Mittwoch 29.03.17 12:29:05      |                     | 10.748 ml     |
| Integration bis : | Mittwoch 29.03.17 12:31:53      |                     | 13.519 ml     |
| Kalibration :     | PDMS_THF_alteSäule_31012014.cal | Eluent :            | THF           |
| MHK - A (Kal.):   | 0.000E+0                        | MHK - K (Kal.):     | 1.000E+0 ml/g |
| Int.Stand.-K:     | 23.429 ml                       | Int.Stand.-M:       | 23.585 ml     |
| Pumpe :           | PSS SECcurity                   | Flußrate :          | 1.000 ml/min  |
| Konzentration :   | 2.000 g/l                       | Injektionsvolumen : | 20.000 µl     |
| Säule 1 :         | PSS SDV 5µm                     | Temperatur :        | 30.000 °C     |
| Säule 2 :         | PSS SDV 5µm                     | Temperatur :        | 30.000 °C     |
| Detektor 1 :      | PSS SECcurity UV                | Versatz :           | 0.000 ml      |
| Detektor 2 :      | PSS SECcurity UV                | Versatz :           | 0.160 ml      |
| Detektor 3 :      | PSS SECcurity RI                | Versatz :           | 0.000 ml      |
| Operateur :       | Beatrice Fischer                | Messintervall :     | 1.000 sec     |

**PSS SECcurity RI**

|           |          |                    |
|-----------|----------|--------------------|
| Mn :      | 9.1277e4 | g/mol              |
| Mw :      | 1.7597e5 | g/mol              |
| Mz :      | 3.1971e5 | g/mol              |
| Mv :      | 0.000000 | g/mol              |
| D :       | 1.9278e0 |                    |
| [n] :     | 0.000000 | ml/g               |
| Vp :      | 1.1823e1 | ml                 |
| Mp :      | 1.4744e5 | g/mol              |
| FI :      | 3.009e-3 | ml <sup>2</sup> /V |
| < 12998   | 0.00     |                    |
| w% :      | 100.00   |                    |
| > 1711465 | 0.00     |                    |

**Figure S2.** GPC analysis of **P0** ( $M_n = 90.000 \text{ g mol}^{-1}$ ,  $M_w = 175.000 \text{ g mol}^{-1}$ ,  $PDI = 1.9$ ).

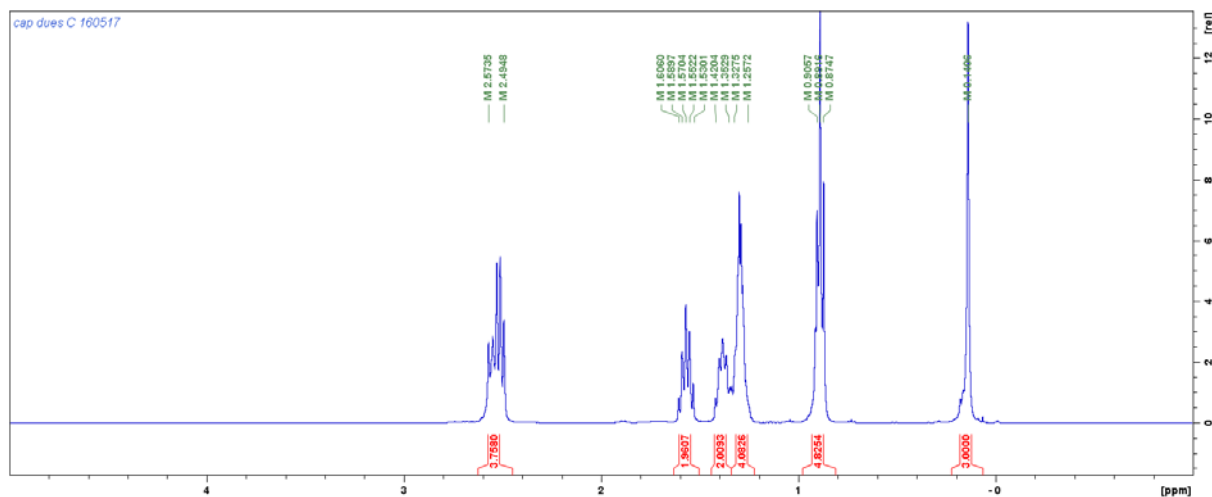

**Figure S3.**  $^1\text{H}$  NMR spectrum of **P2**.

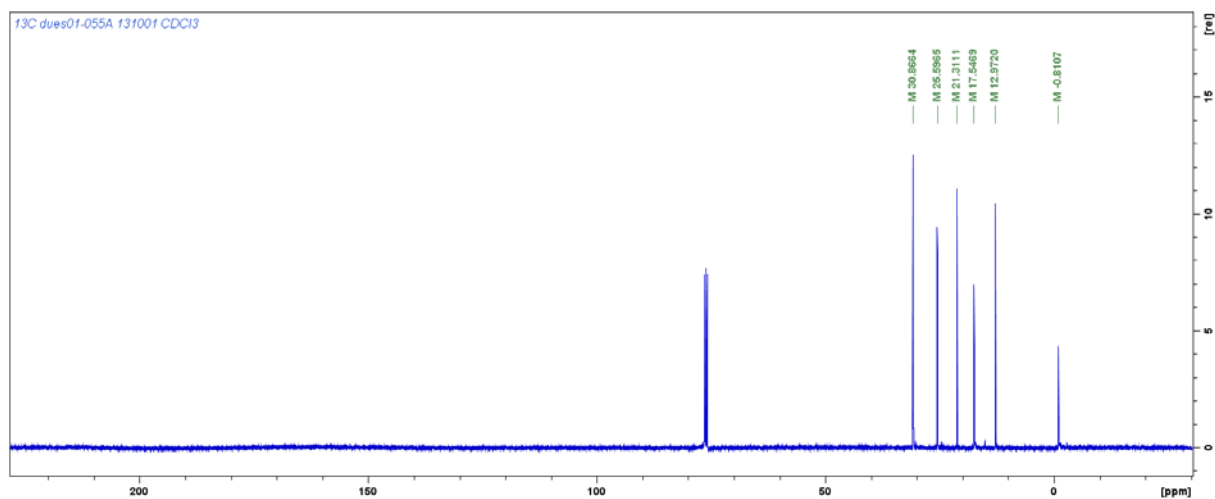

**Figure S4.** <sup>13</sup>C NMR spectrum of P2.

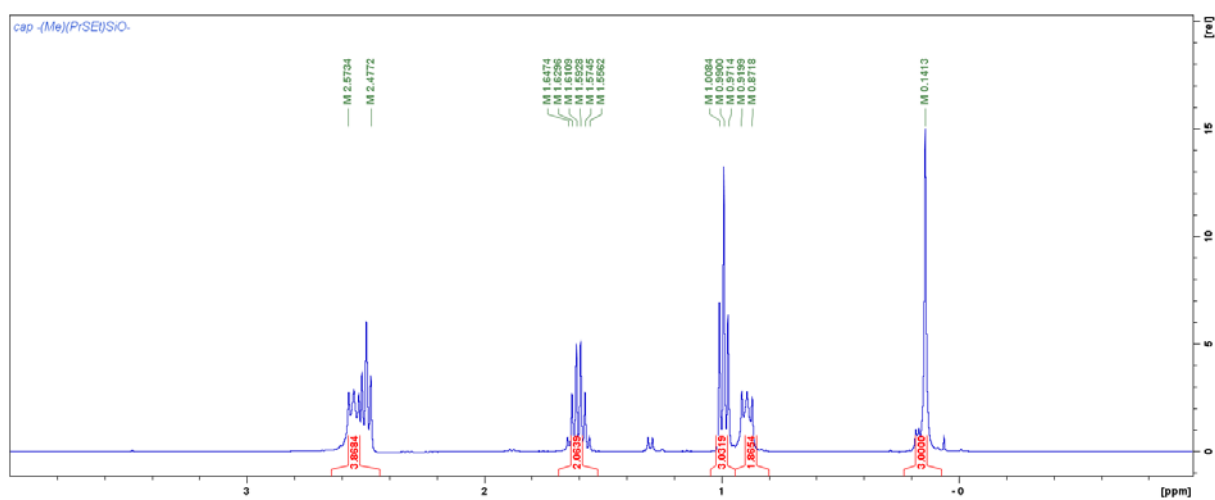

**Figure S5.** <sup>1</sup>H NMR spectrum of P3.

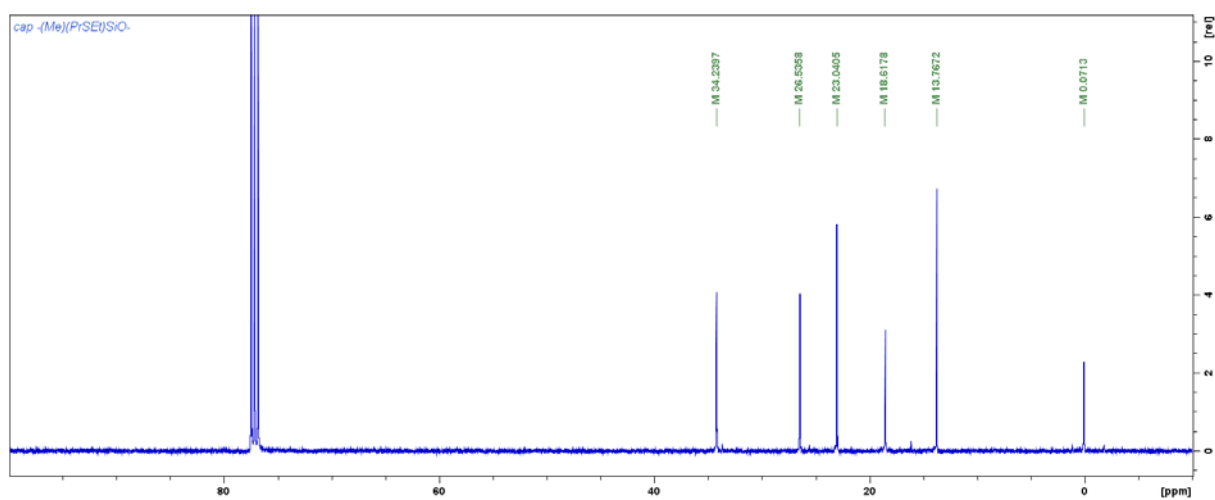

**Figure S6.** <sup>13</sup>C NMR spectrum of P3.

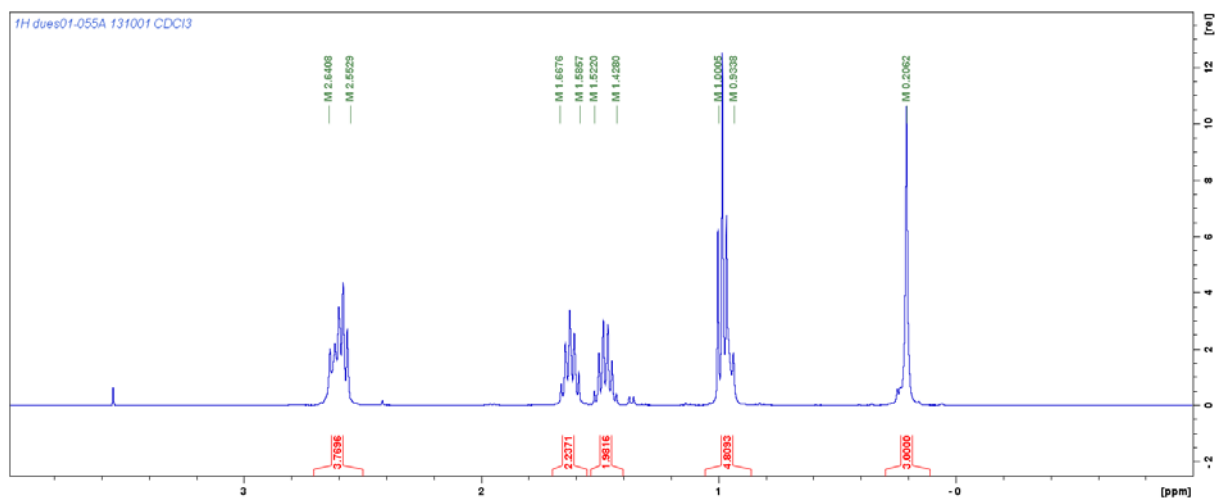

**Figure S7.** <sup>1</sup>H NMR spectrum of P4.

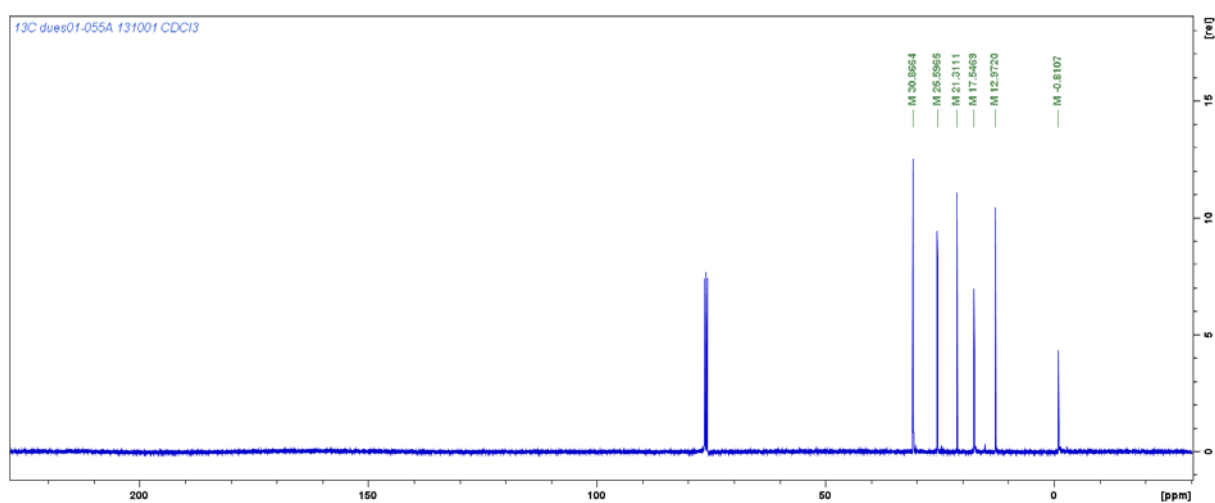

**Figure S8.** <sup>13</sup>C NMR spectrum of P4.

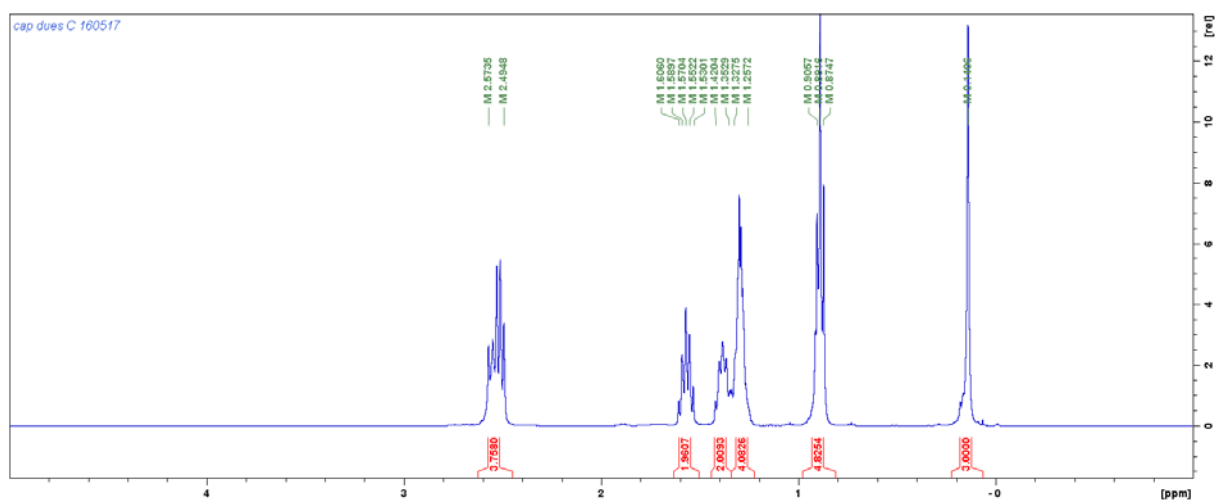

**Figure S9.** <sup>1</sup>H NMR spectrum of P6.

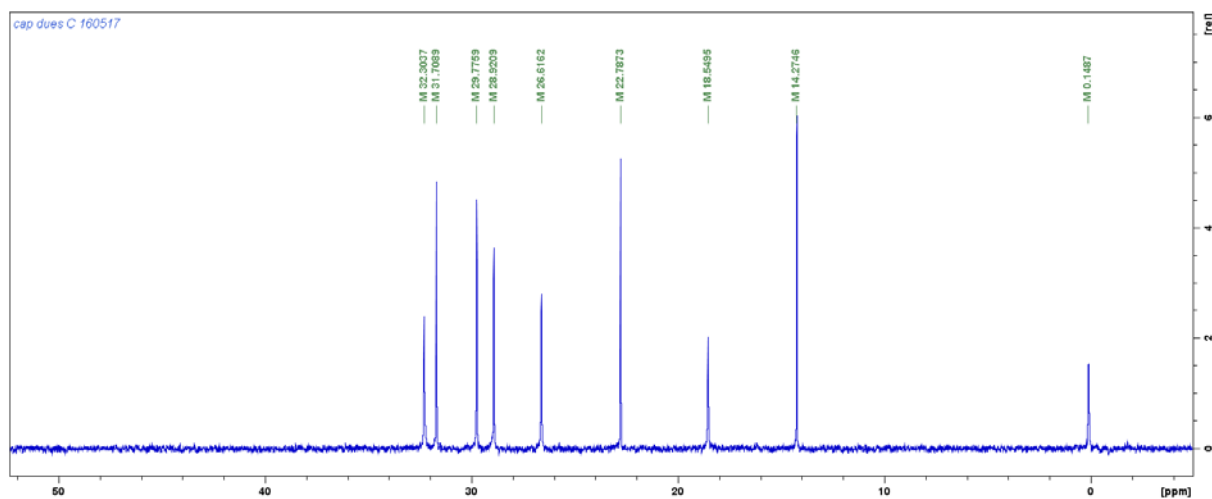

**Figure S10.**  $^{13}\text{C}$  NMR spectrum of **P6**.

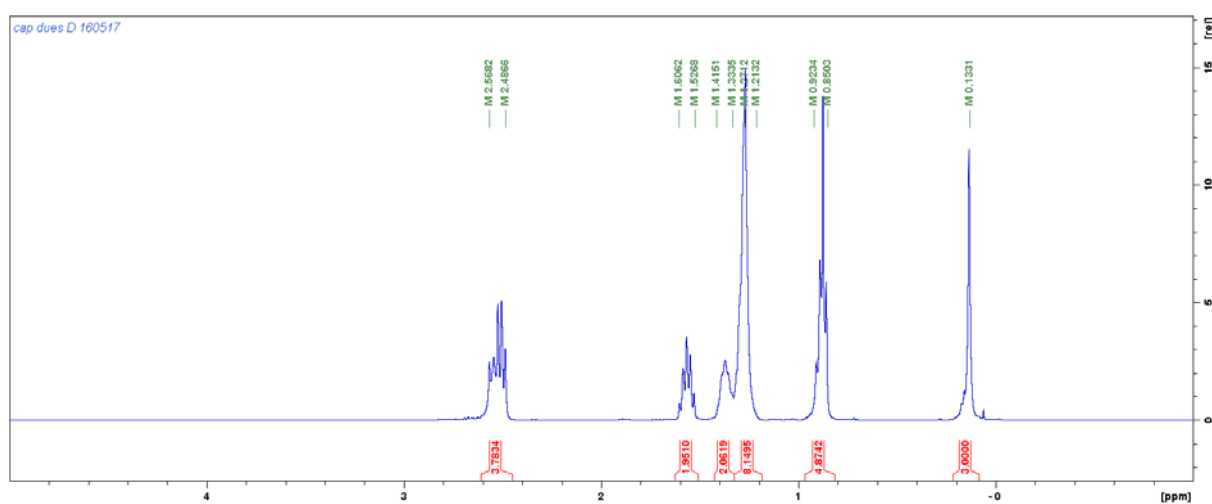

**Figure S11.**  $^1\text{H}$  NMR spectrum of **P8**.

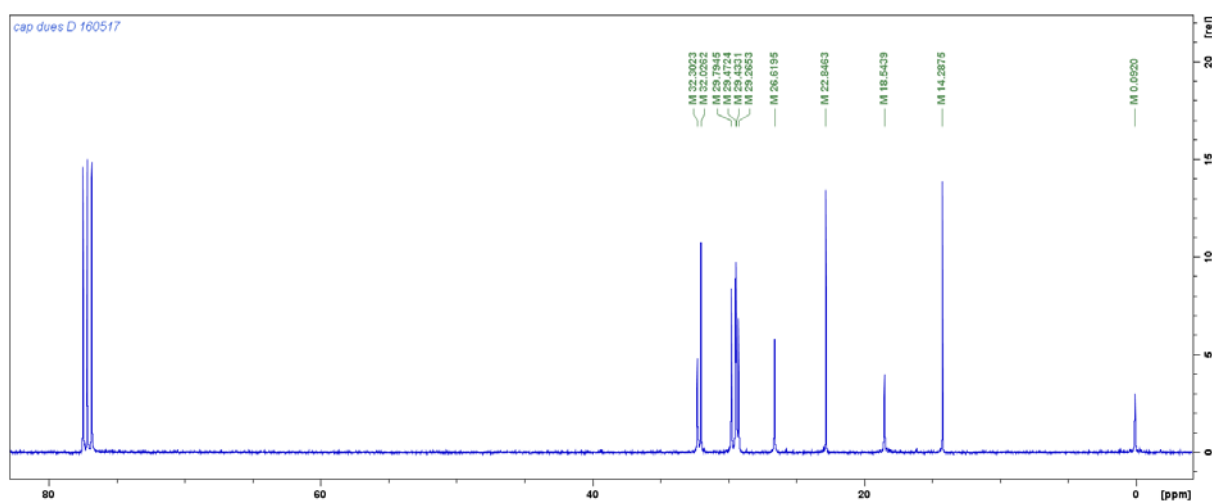

**Figure S12.**  $^{13}\text{C}$  NMR spectrum of **P8**.

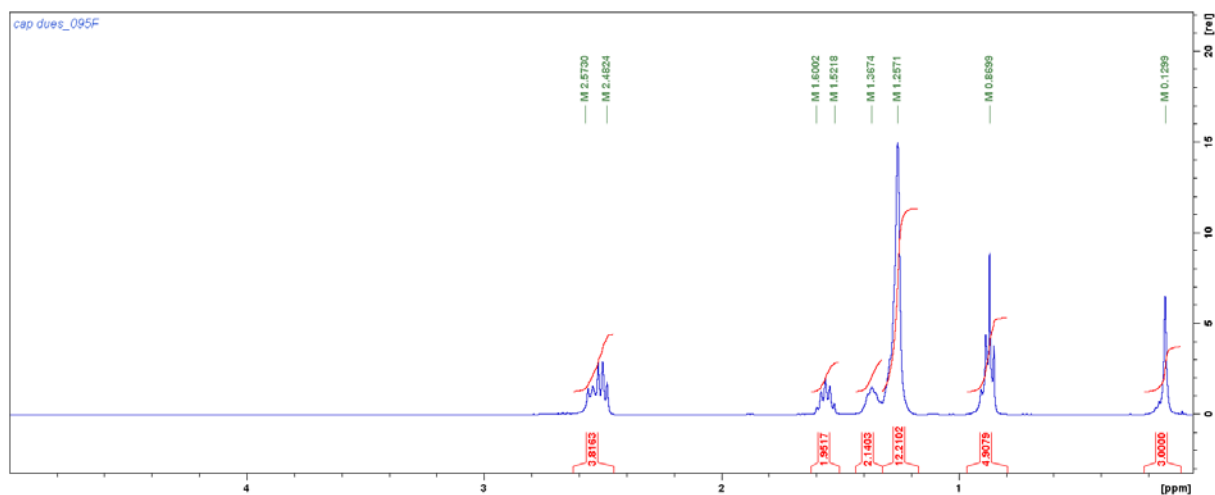

**Figure S13.**  $^1\text{H}$  NMR spectrum of **P10**.

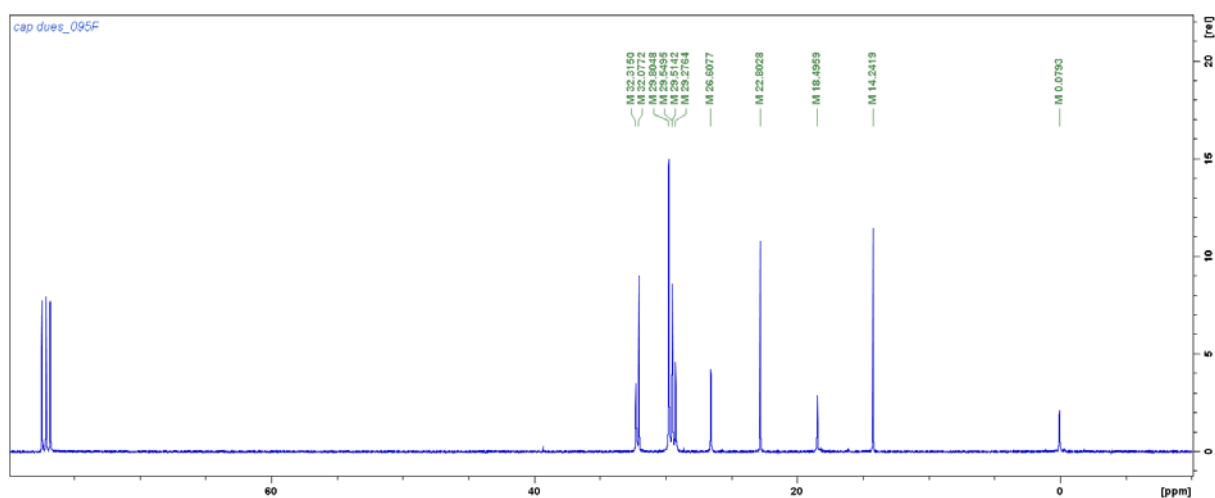

**Figure S14.**  $^{13}\text{C}$  NMR spectrum of **P10**.

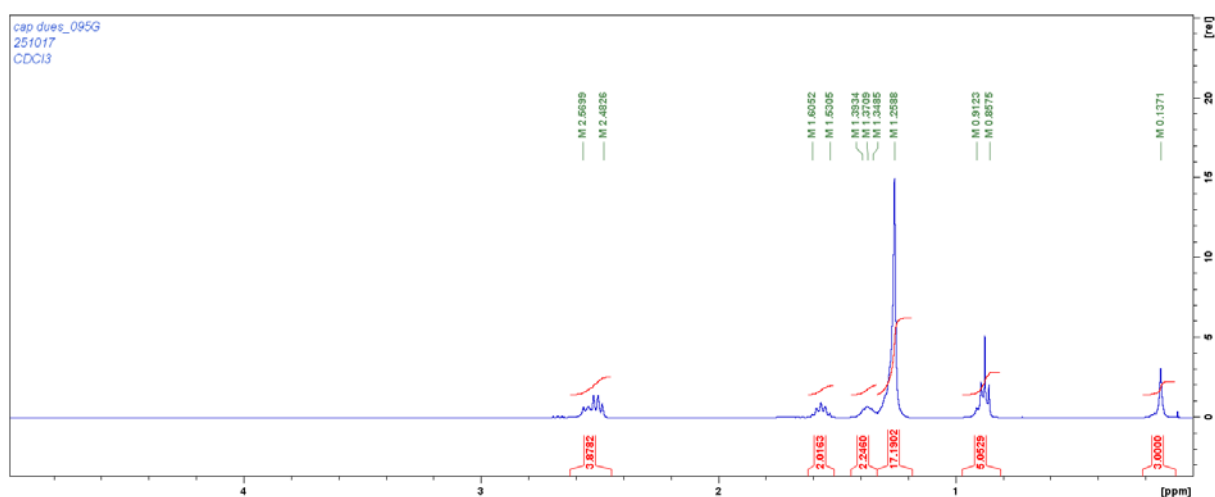

**Figure S15.**  $^1\text{H}$  NMR spectrum of **P12**.

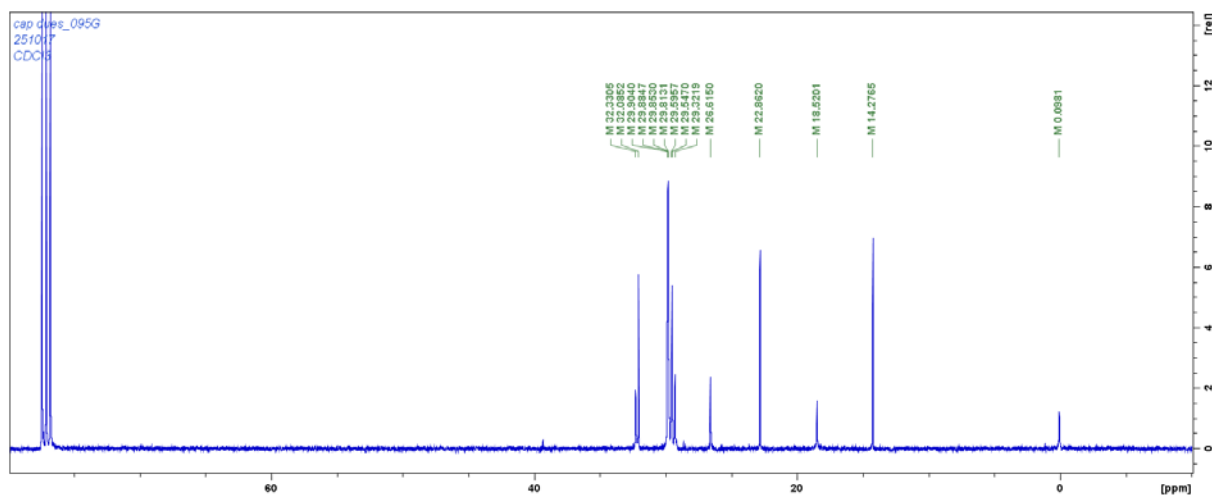

**Figure S16.**  $^{13}\text{C}$  NMR spectrum of **P12**.

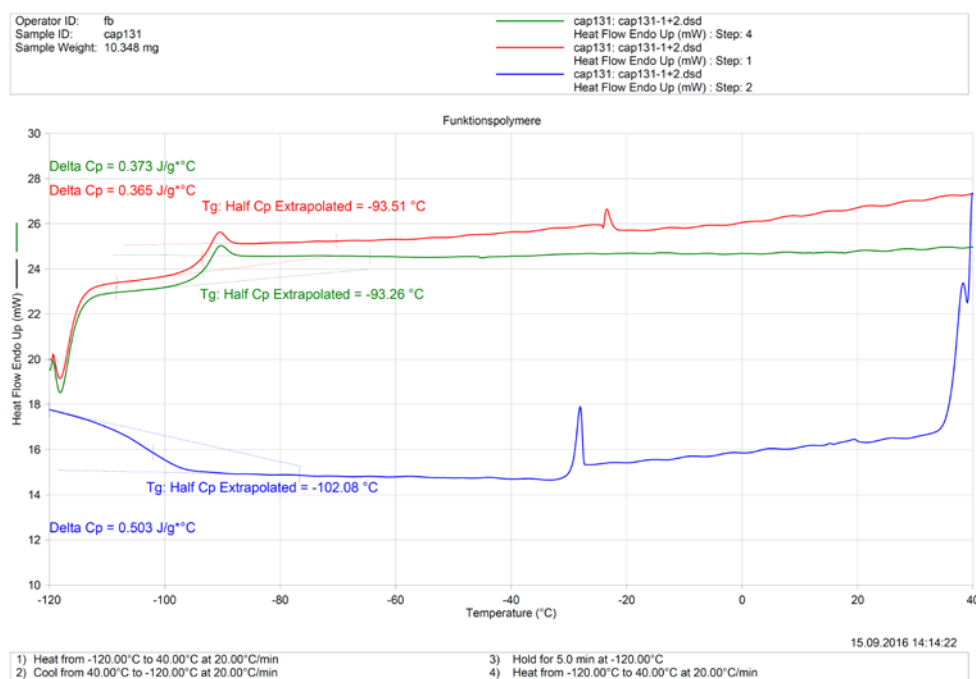

**Figure S17.** DSC curves of **P2**.

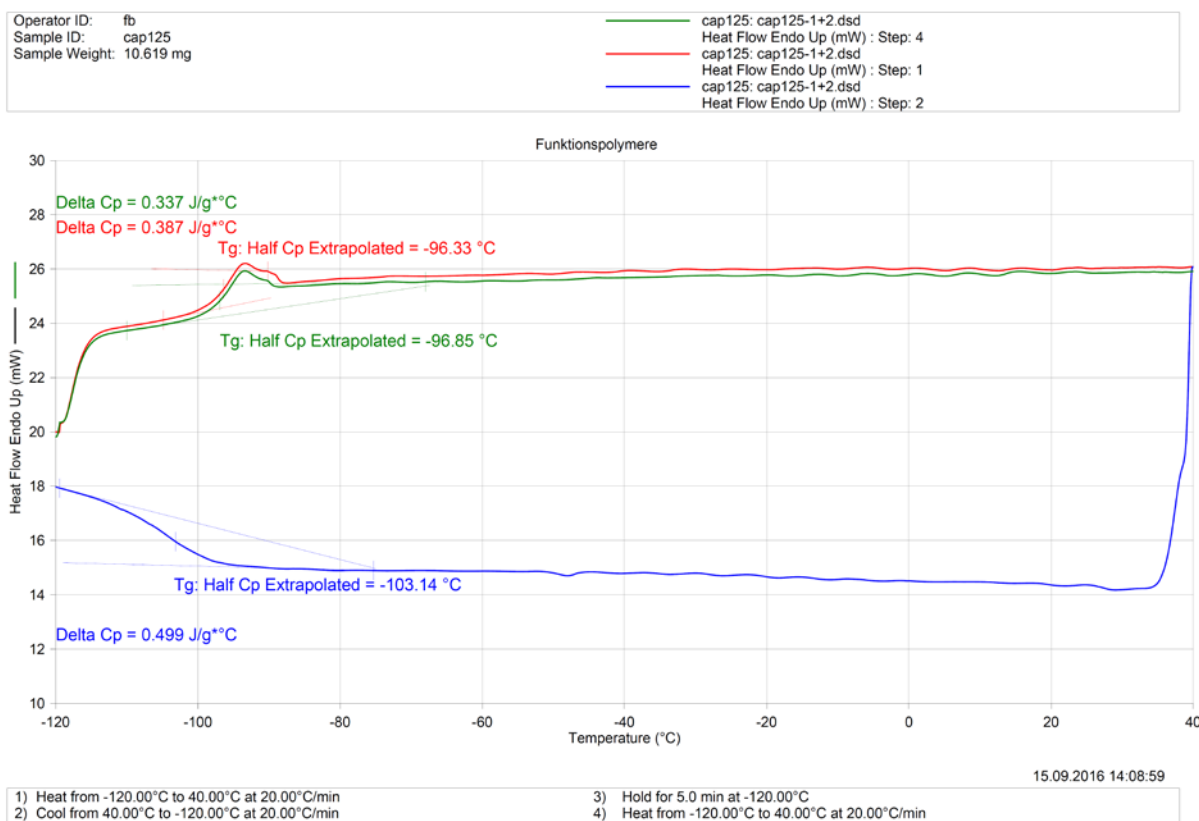

**Figure S18.** DSC curves of P2.

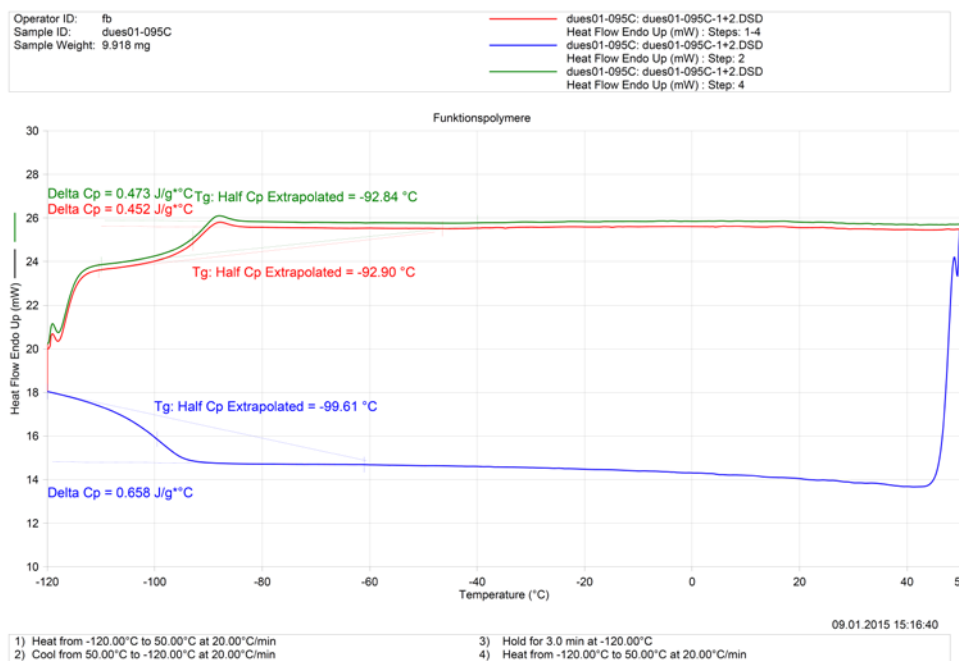

**Figure S19.** DSC curves of P6.



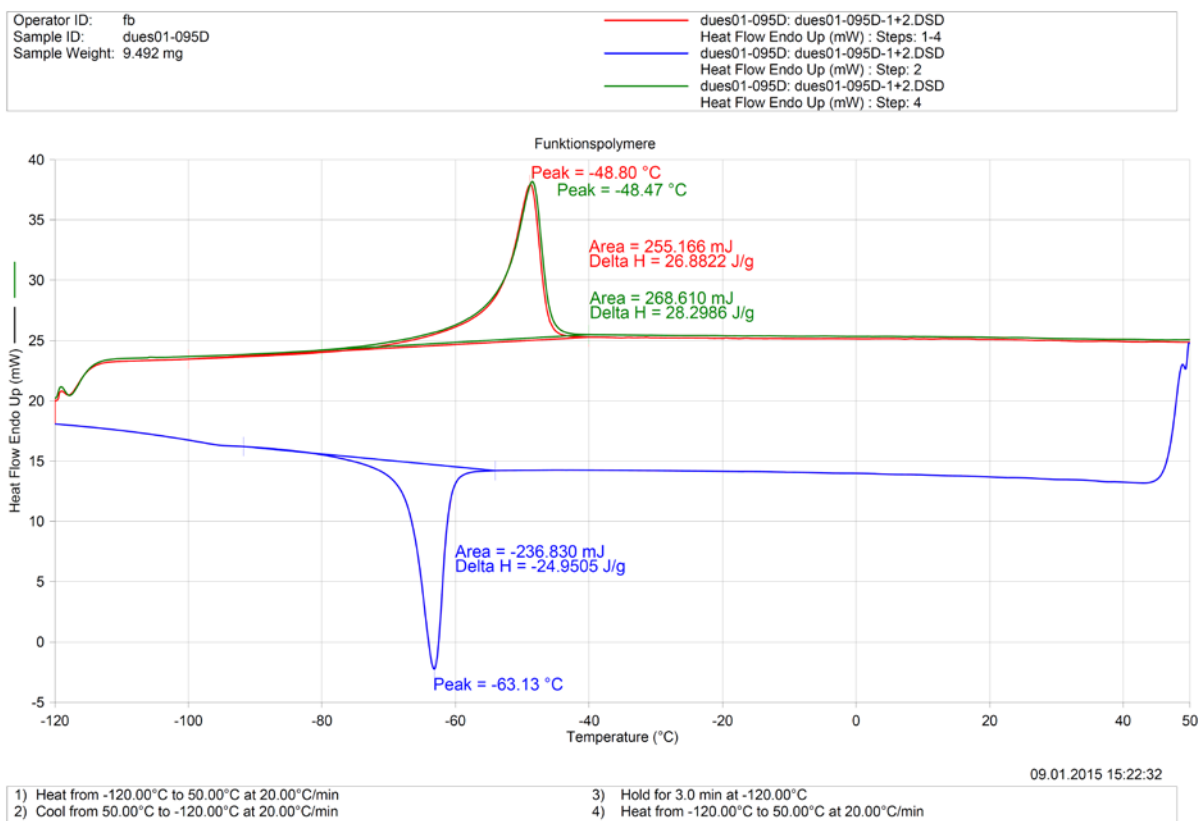

**Figure S20.** DSC curves of **P8**.

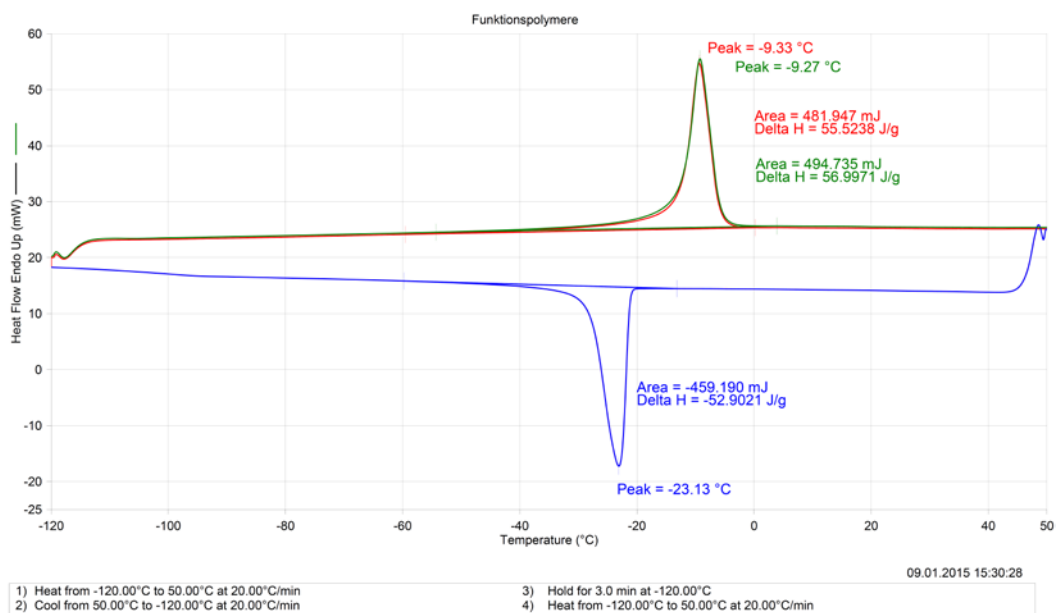

**Figure S21.** DSC curves of **C10**.

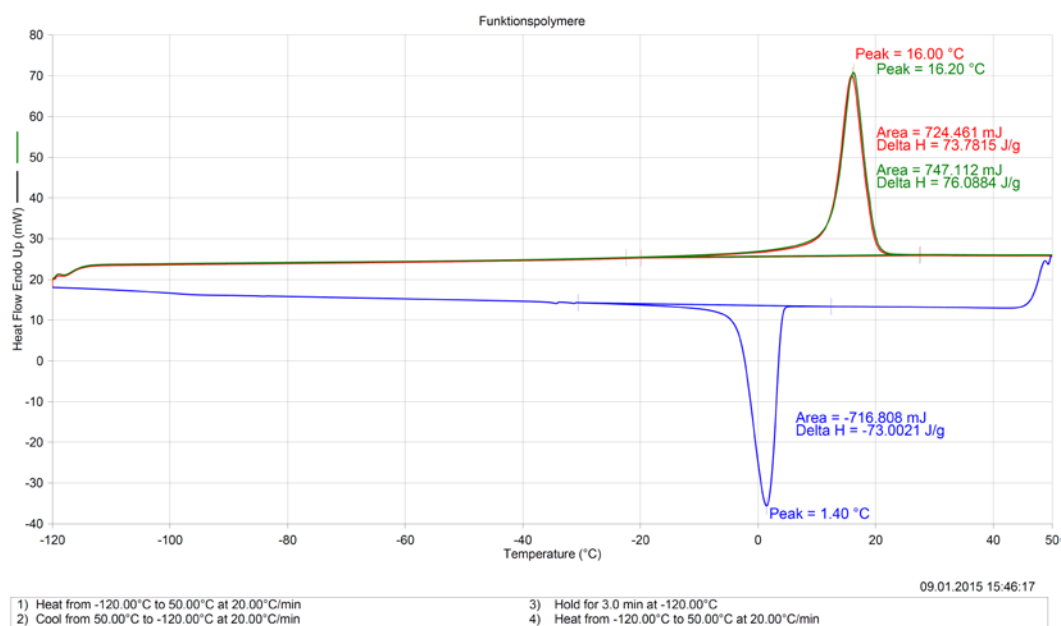

**Figure S22.** DSC curves of P12.

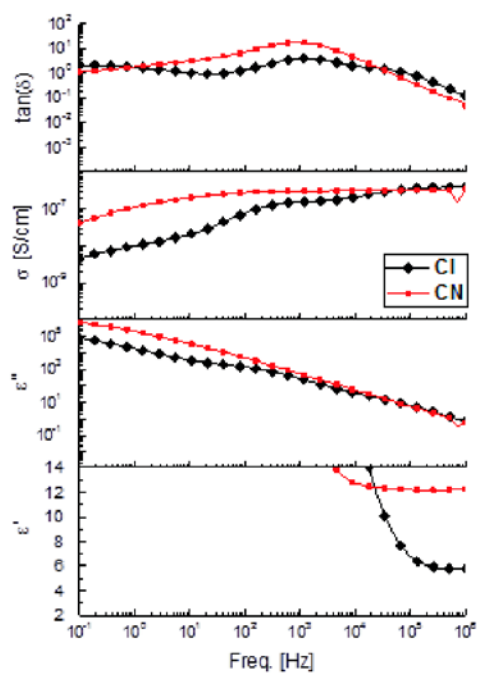

**Figure S23.** Dielectric properties of CI-CL and CN-CL. Dielectric permittivity  $\epsilon'$  was taken at  $10^6$  Hz where the contribution of ions can be neglected.

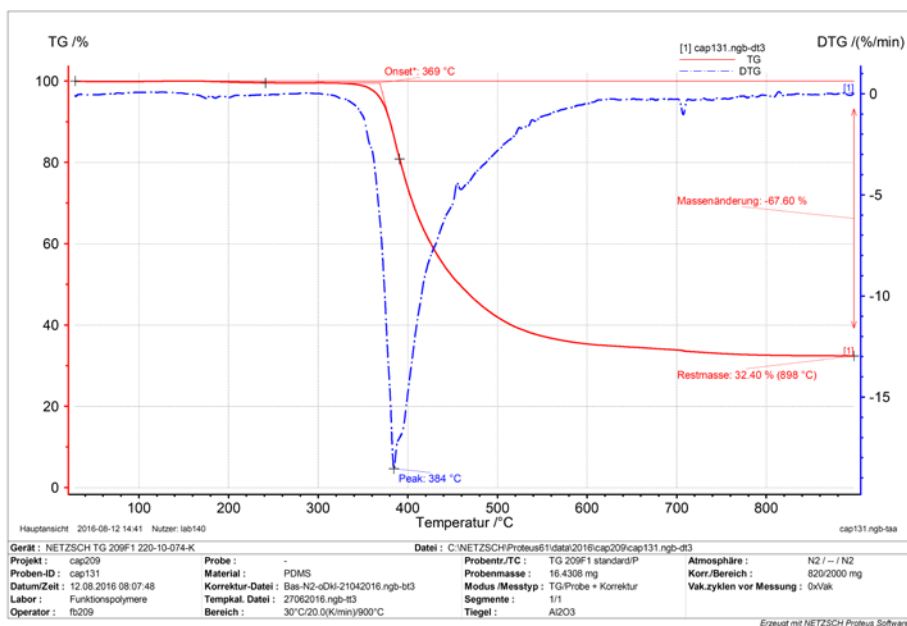

Figure S24. TGA curve of P2.

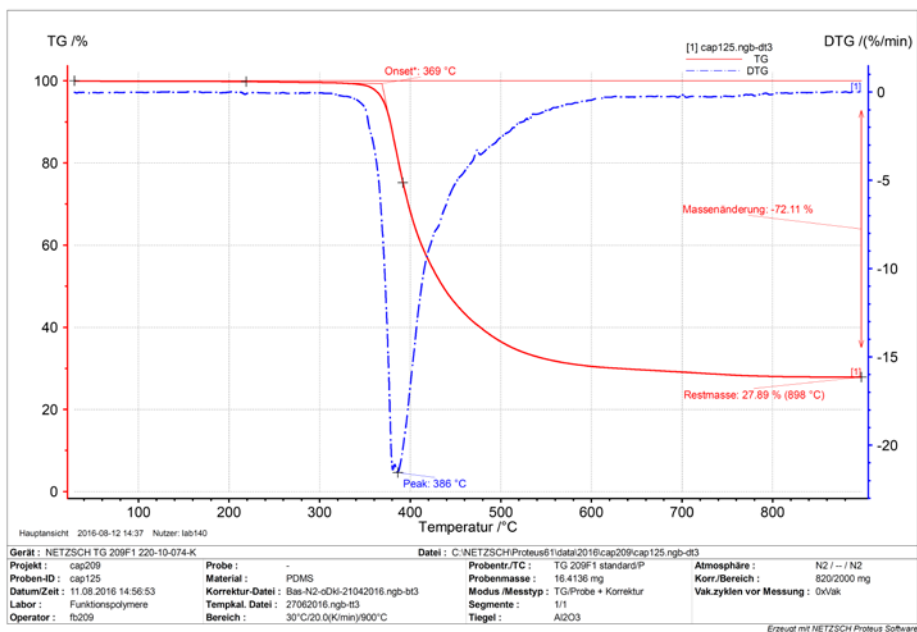

Figure S25. TGA curve of P3.

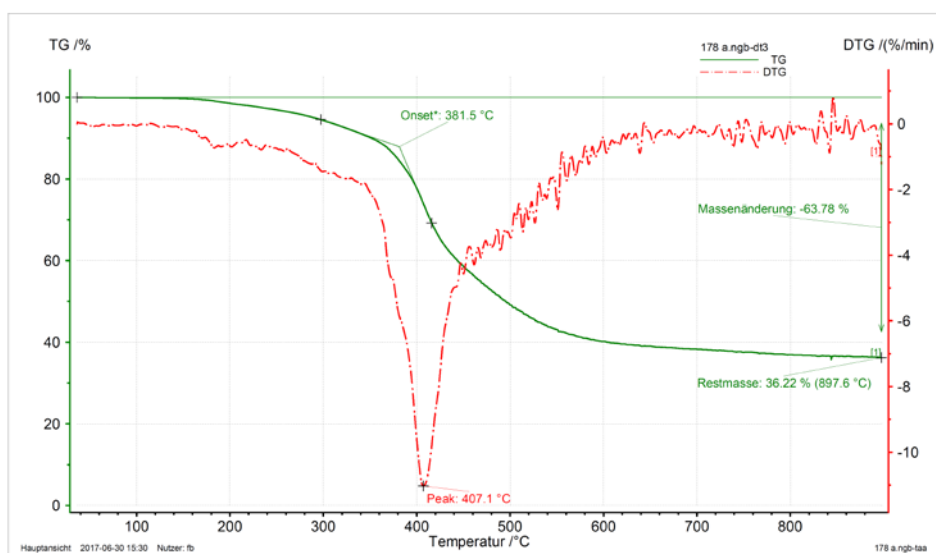

**Figure S26.** TGA curve of E2-Cl-33.

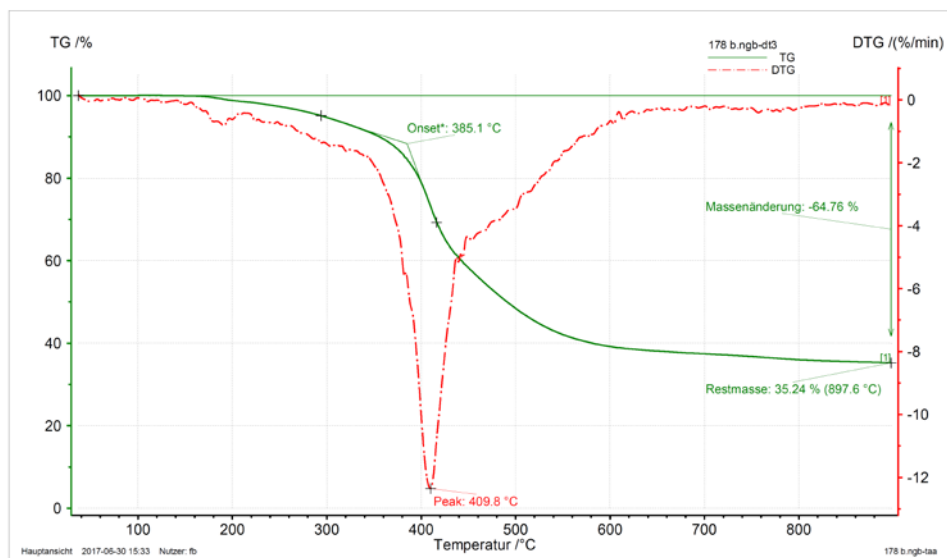

**Figure S27.** TGA curve of E2-Cl-20.

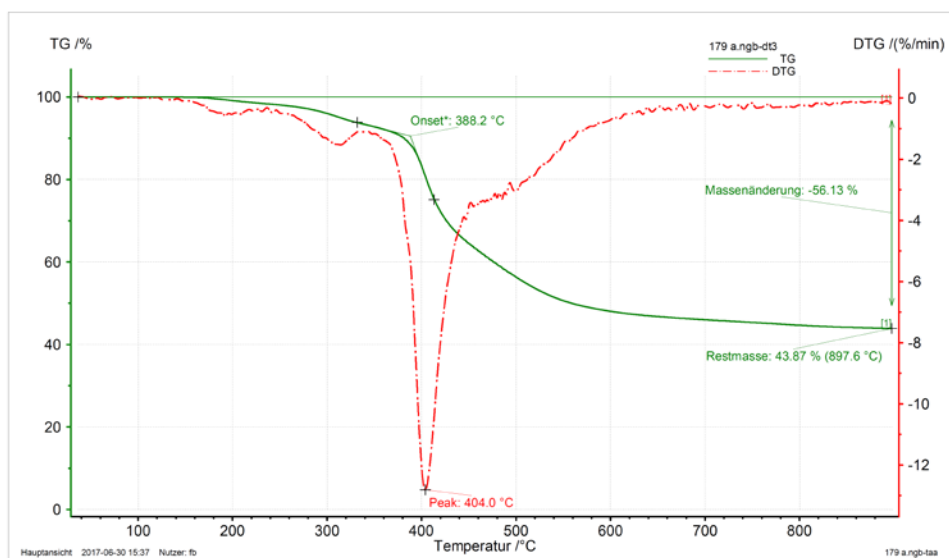

**Figure S28.** TGA curve of E2-CN-33.

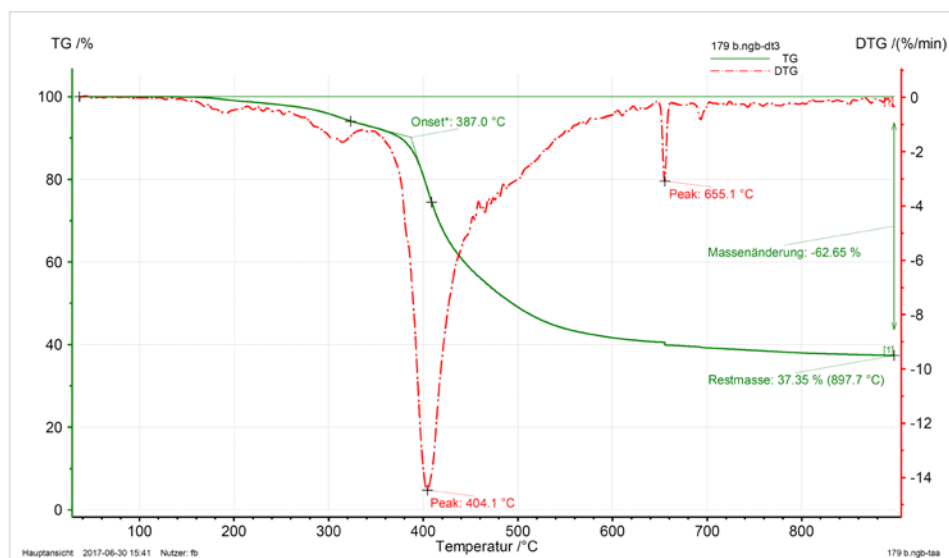

**Figure S29.** TGA curve of E2-CN-20.

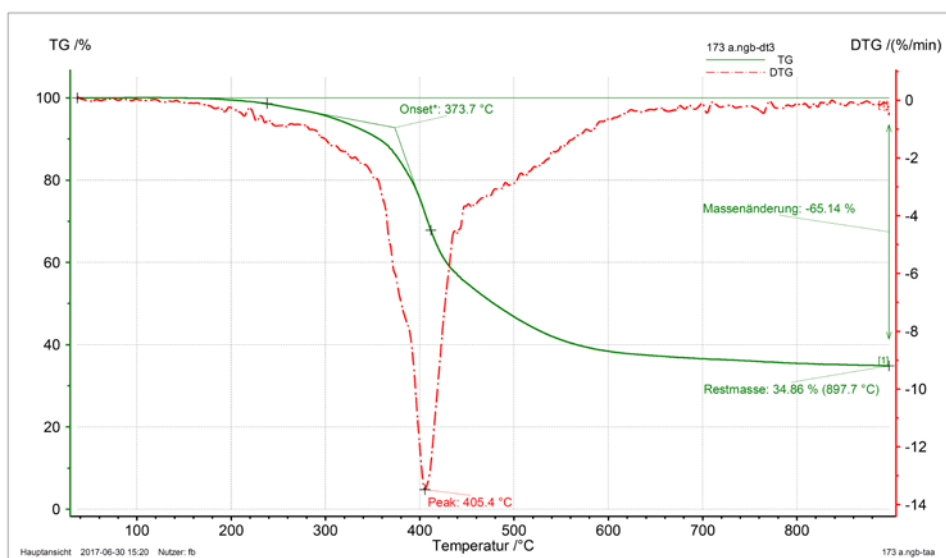

**Figure S30.** TGA curve of E3-CI-33.

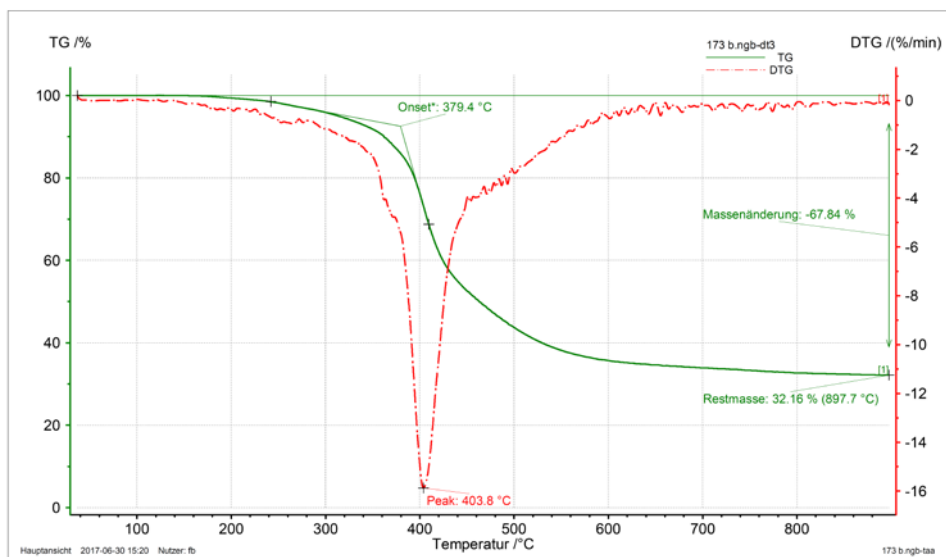

**Figure S31.** TGA curve of E3-CI-20.

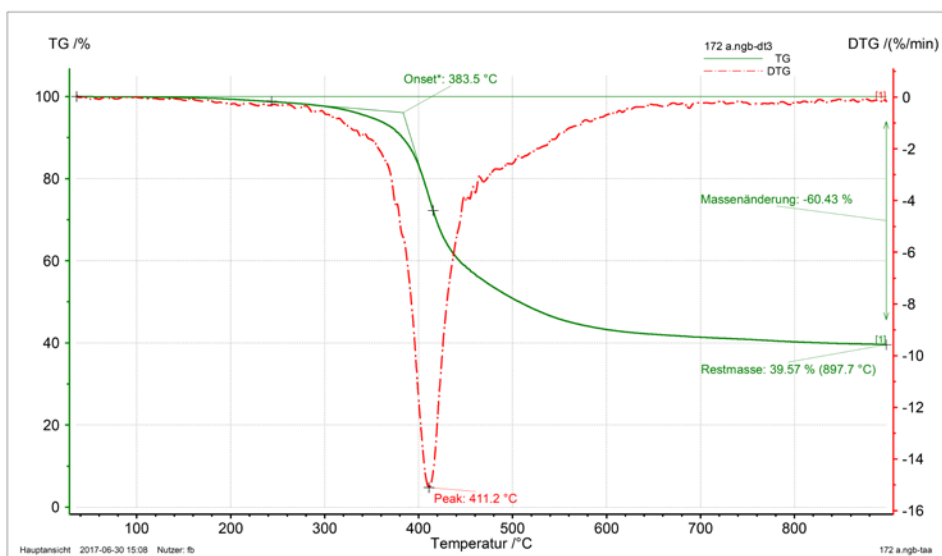

**Figure S32.** TGA curve of **E3-CN-33**.

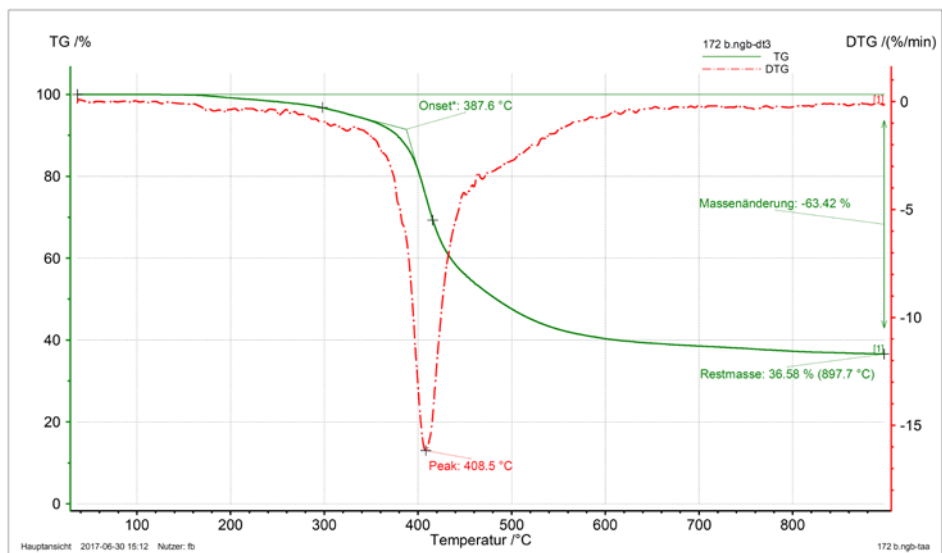

**Figure S33.** TGA curve of **E3-CN-20**.

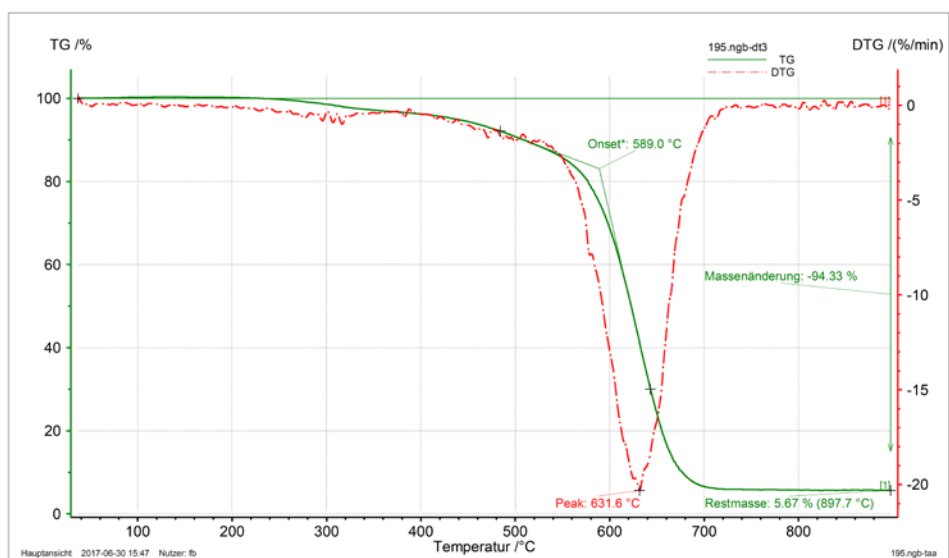

**Figure S34.** TGA curve of **Er-Cl-33**.

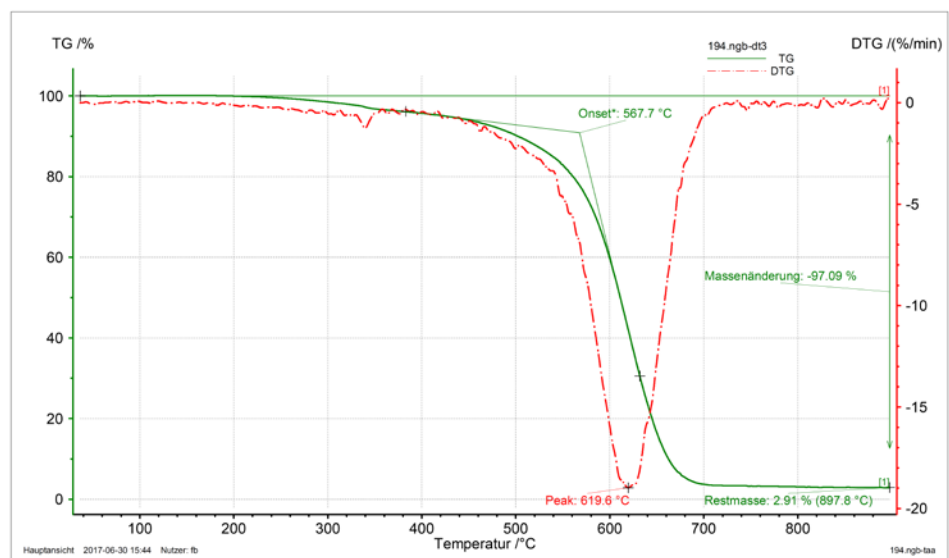

**Figure S35.** TGA curve of **Er-Cl-20**.



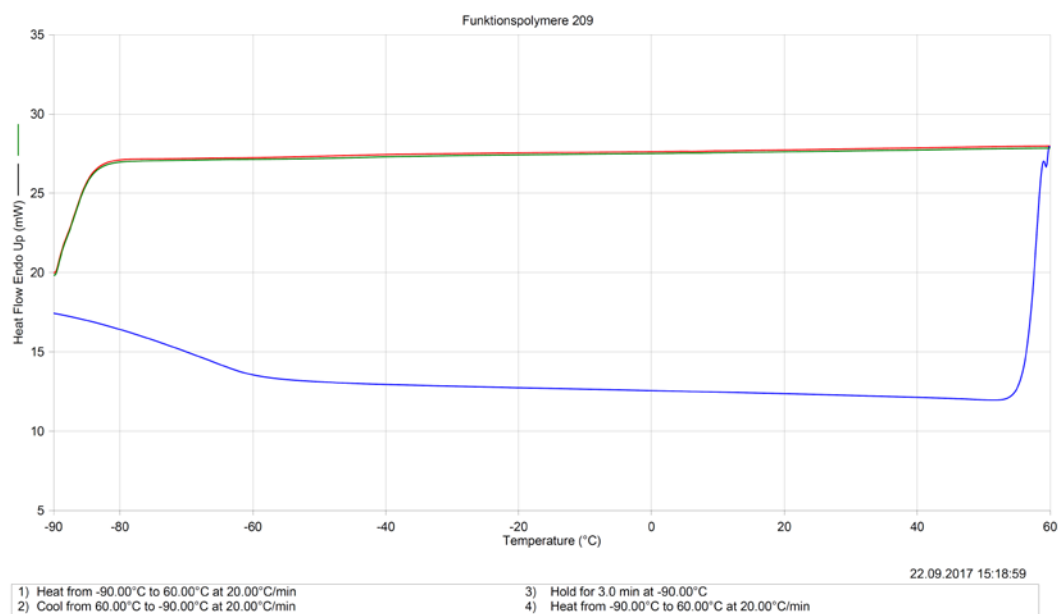

**Figure S36.** DSC curves of **E2-CI-20**.

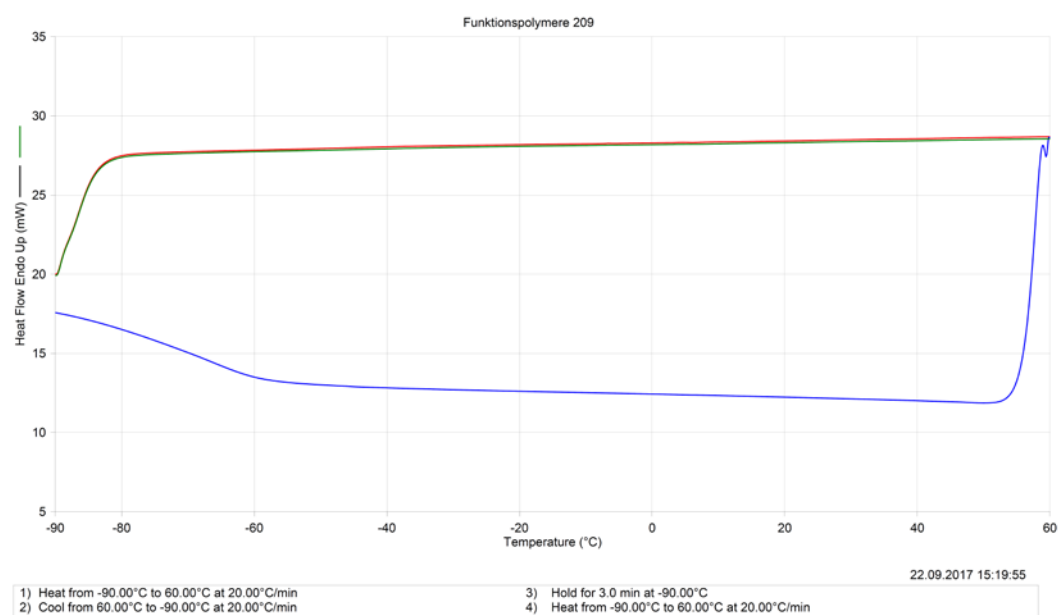

**Figure S37.** DSC curves of **E2-CI-33**.

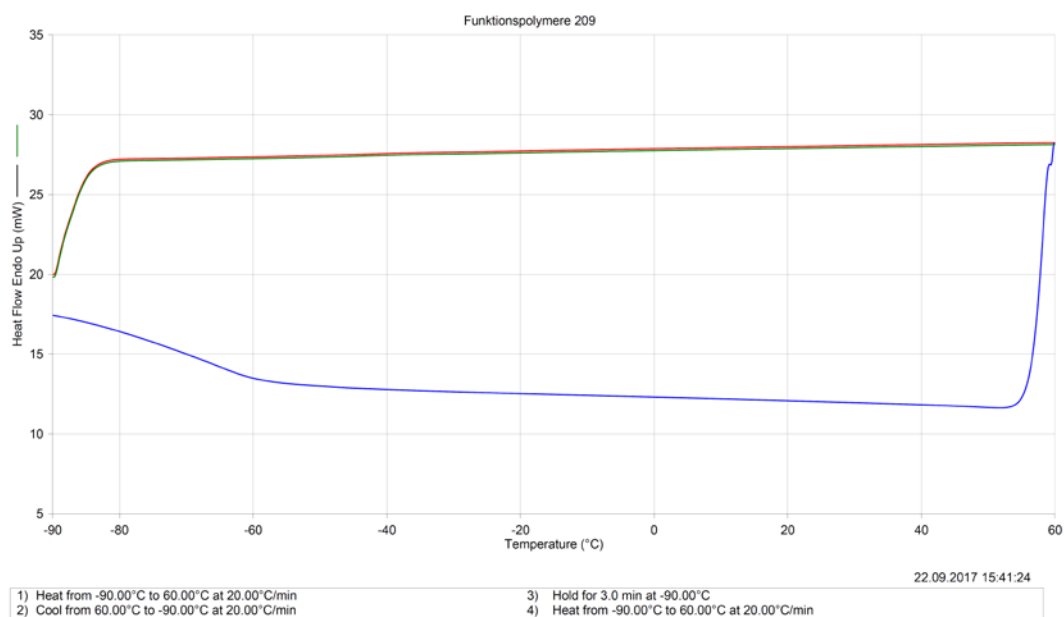

**Figure S38.** DSC curves of **E2-CN-20**.

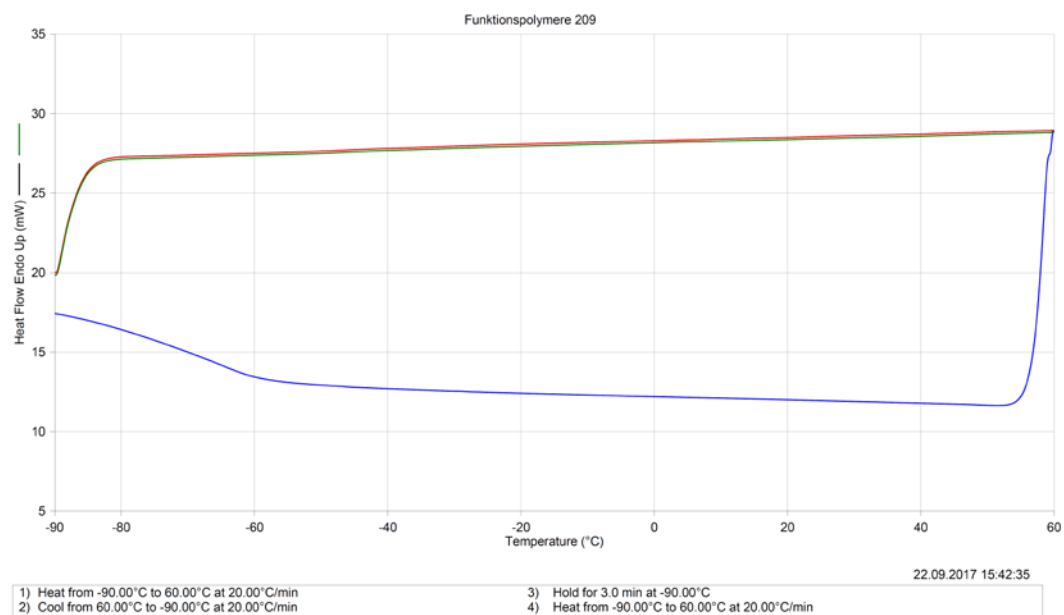

**Figure S39.** DSC curves of **E2-CN-33**.

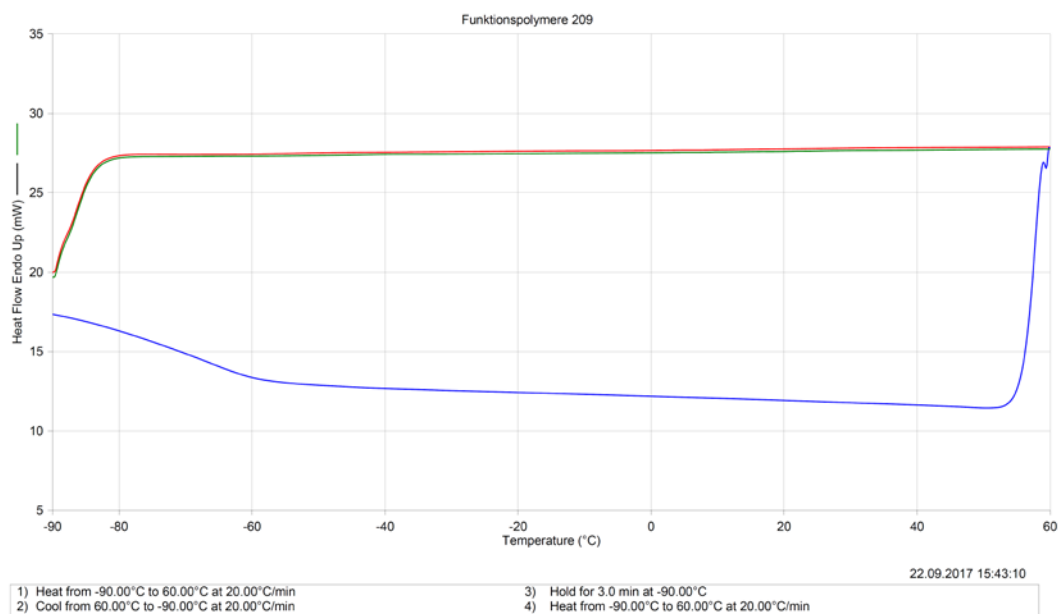

**Figure S40.** DSC curves of E3-Cl-20.

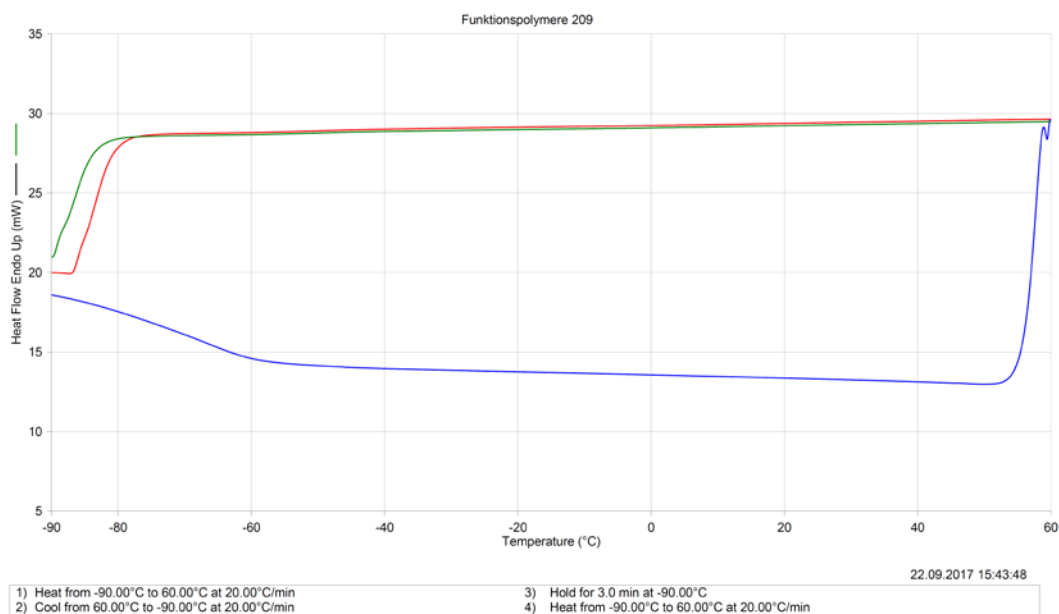

**Figure S41.** DSC curves of E3-Cl-33.

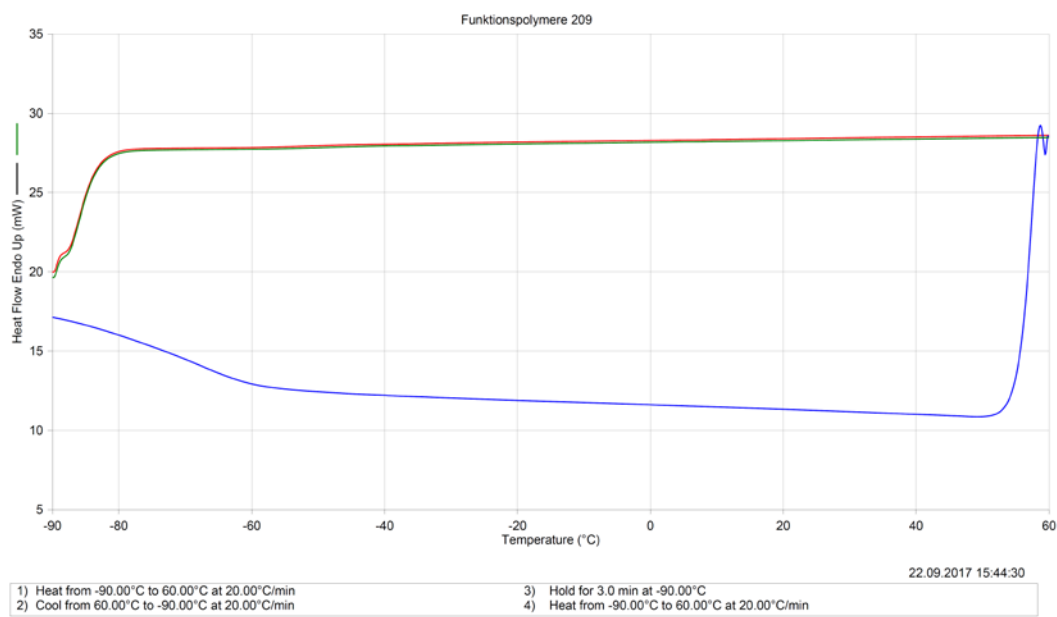

**Figure S42.** DSC curves of **E3-CN-20**.

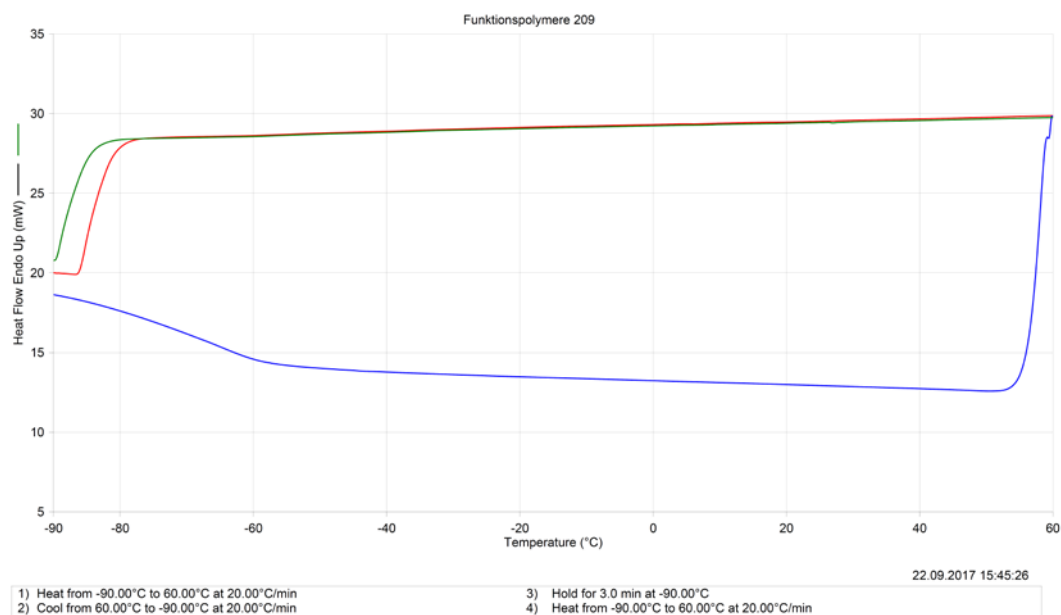

**Figure S43.** DSC curves of **E3-CN-33**.

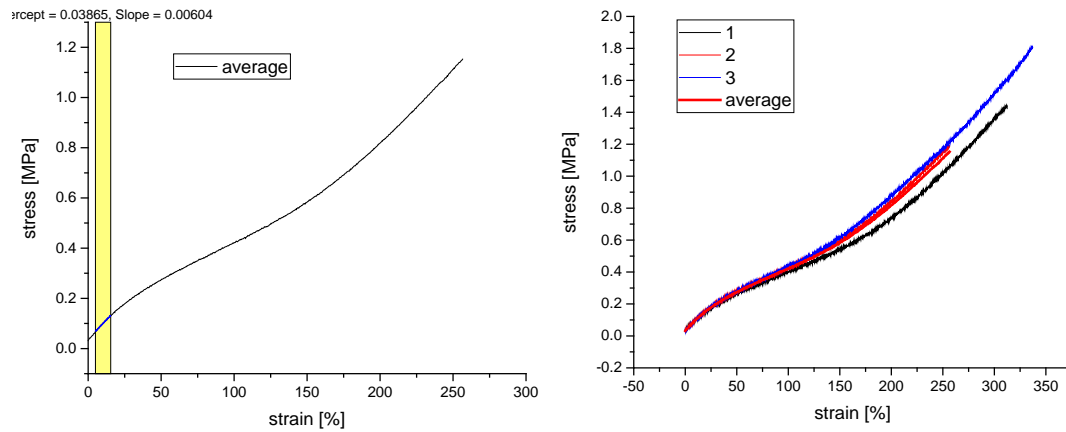

**Figure S44.** Tensile tests of **Er**. Three independent tests were performed.

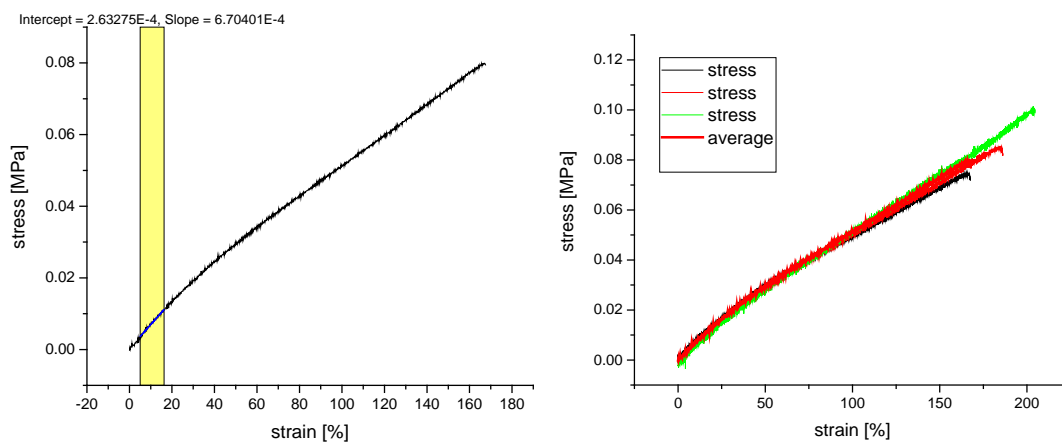

**Figure S45.** Tensile tests of **E2**. Three independent tests were performed.

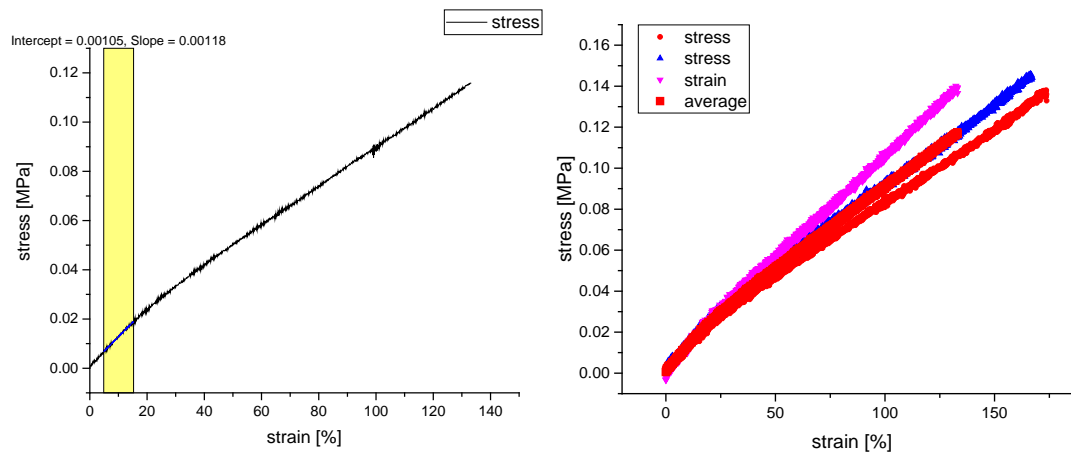

**Figure S46.** Tensile tests of **E3**. Three independent tests were performed.

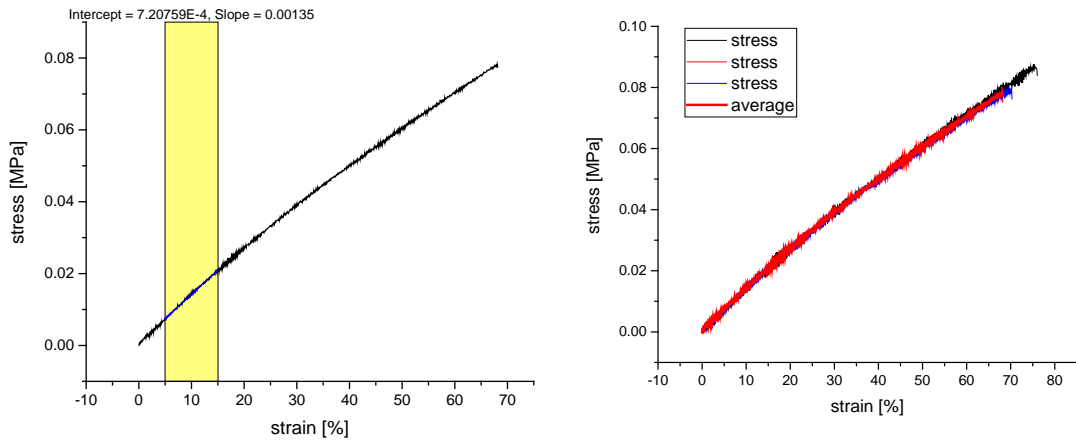

**Figure S47.** Tensile tests of **E4**. Three independent tests were performed.

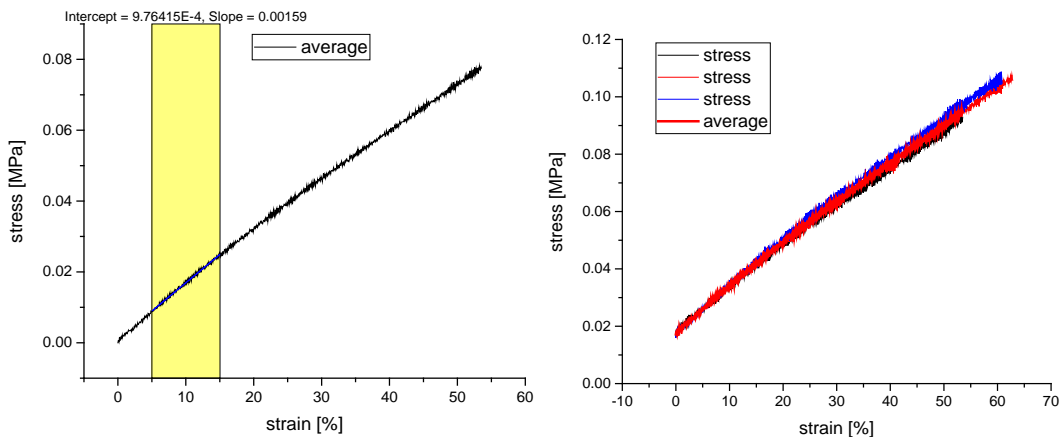

**Figure S48.** Tensile tests of **E6**. Three independent tests were performed.

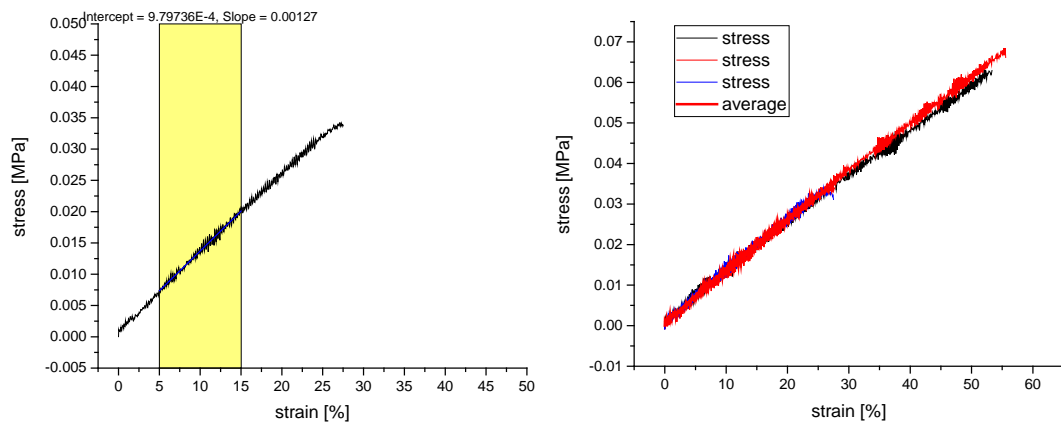

**Figure S49.** Tensile tests of **E8**. Three independent tests were performed.

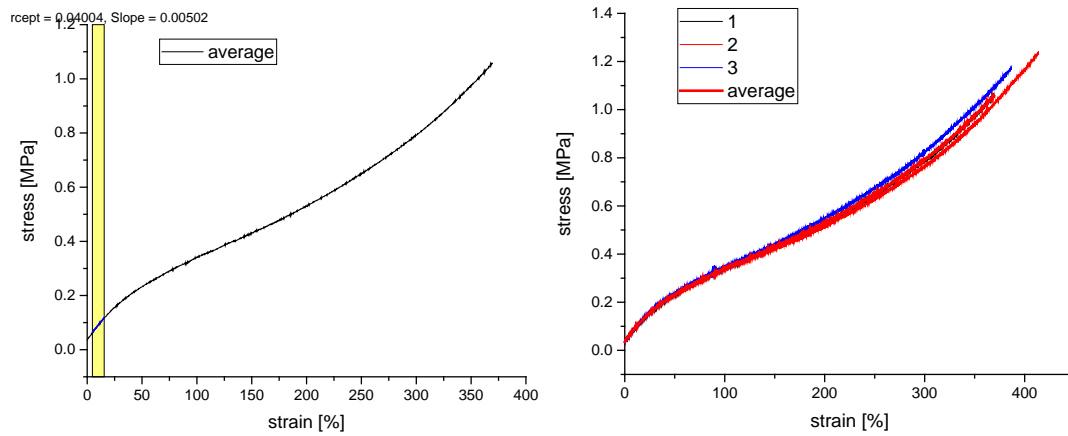

**Figure S50.** Tensile tests of **Er-CI-20**. Three independent tests were performed.

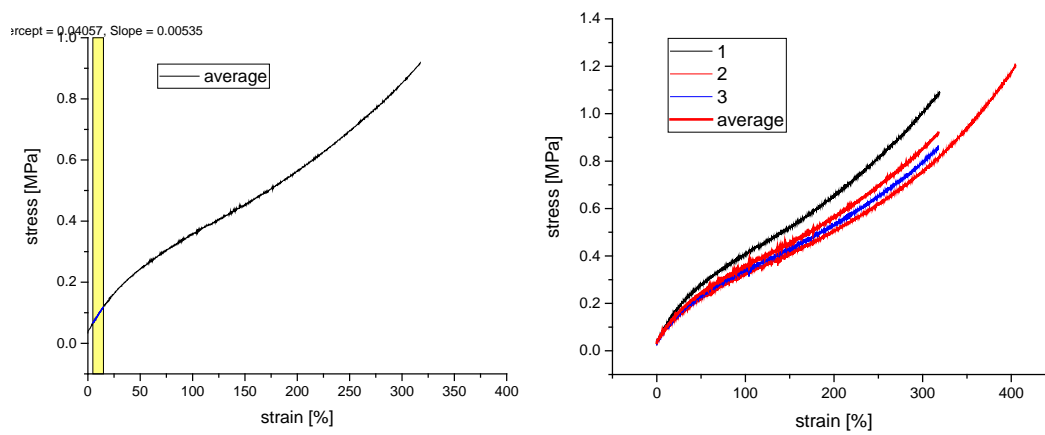

**Figure S51.** Tensile tests of **Er-CI-33**. Three independent tests were performed.

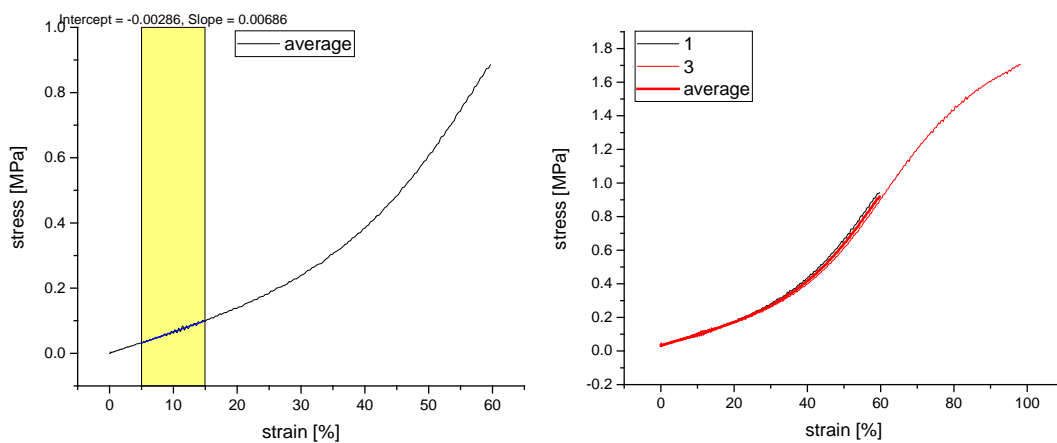

**Figure S52.** Tensile tests of **E2-CI-33**. Two independent tests were performed.

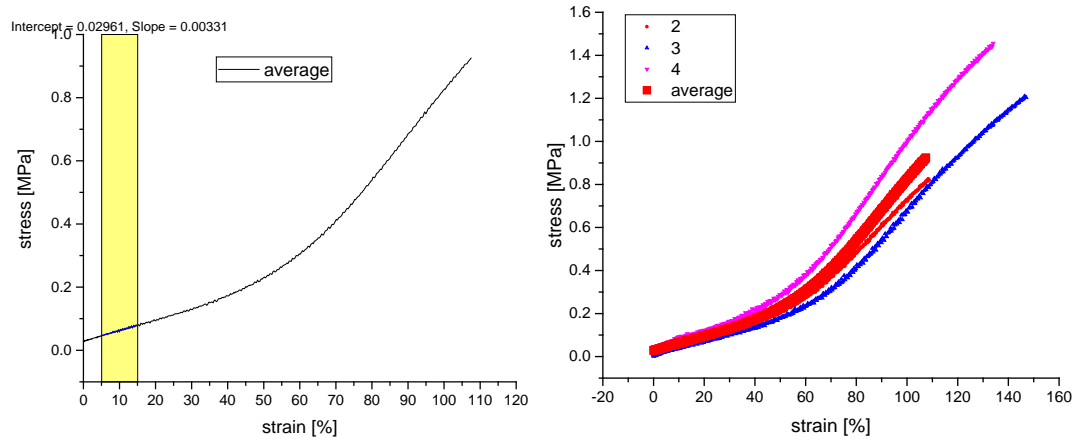

**Figure S53.** Tensile tests of **E2-CI-20**. Three independent tests were performed.

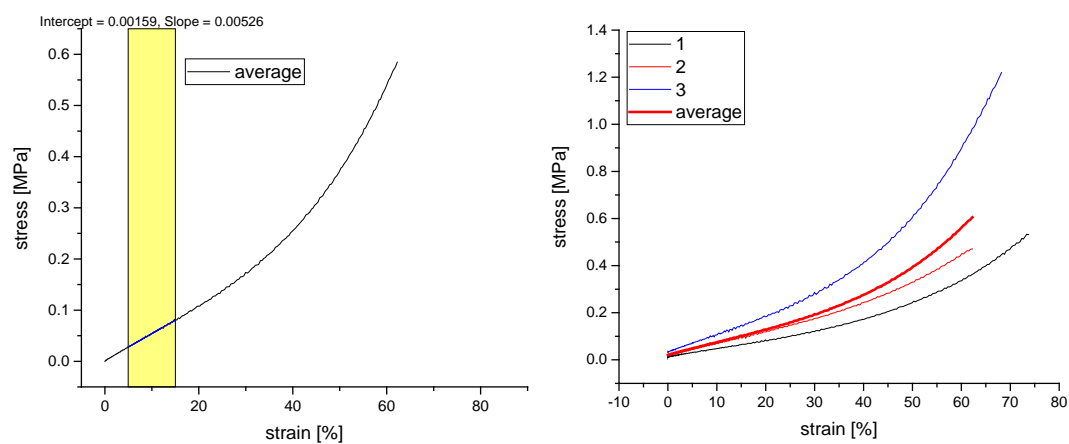

**Figure S54.** Tensile tests of **E3-CI-33**. Three independent tests were performed.

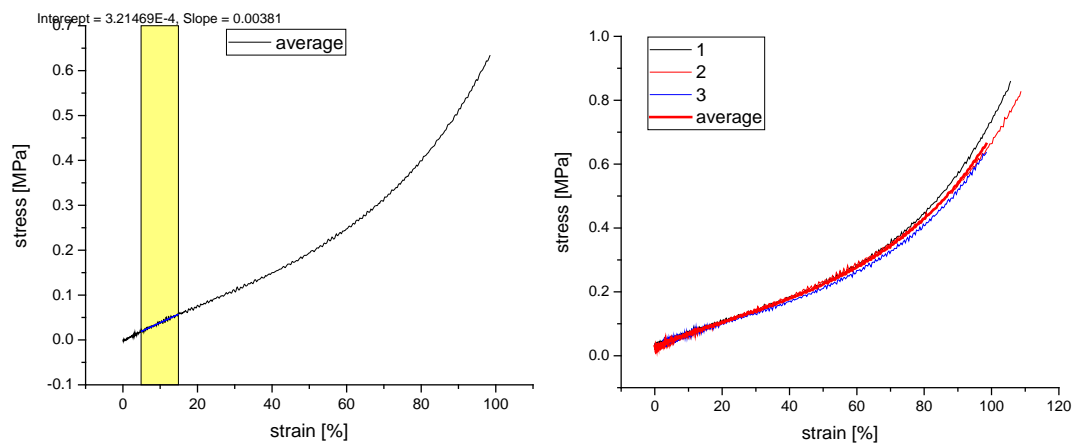

**Figure S55.** Tensile tests of **E3-CI-20**. Three independent tests were performed.



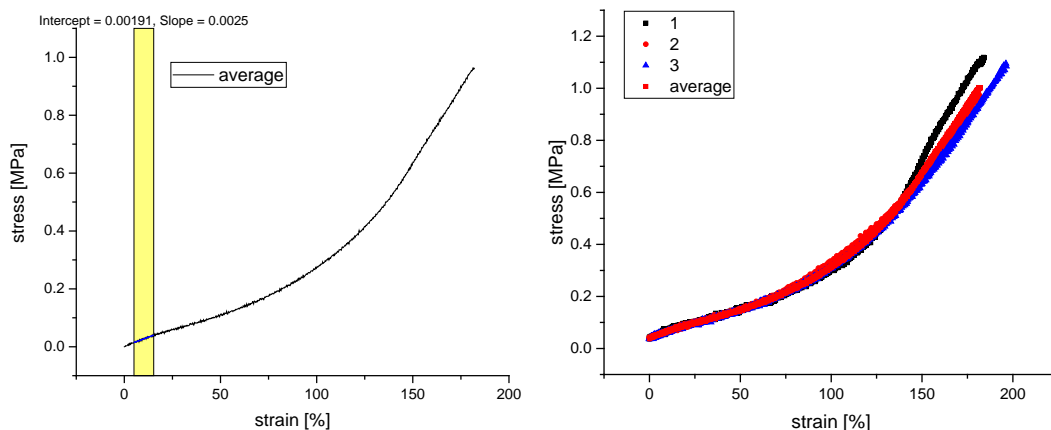

**Figure S56.** Tensile tests of **E2-CN-33**. Three independent tests were performed.

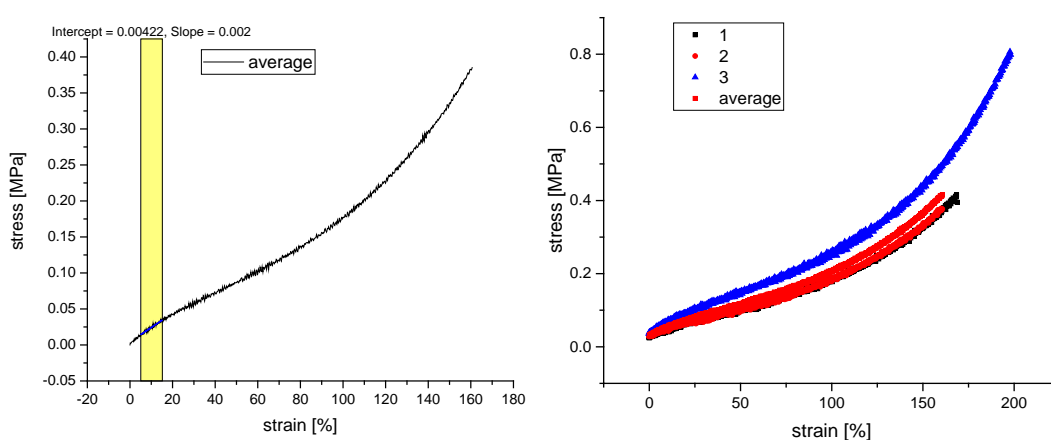

**Figure S57.** Tensile tests of **E2-CN-20**. Three independent tests were performed.

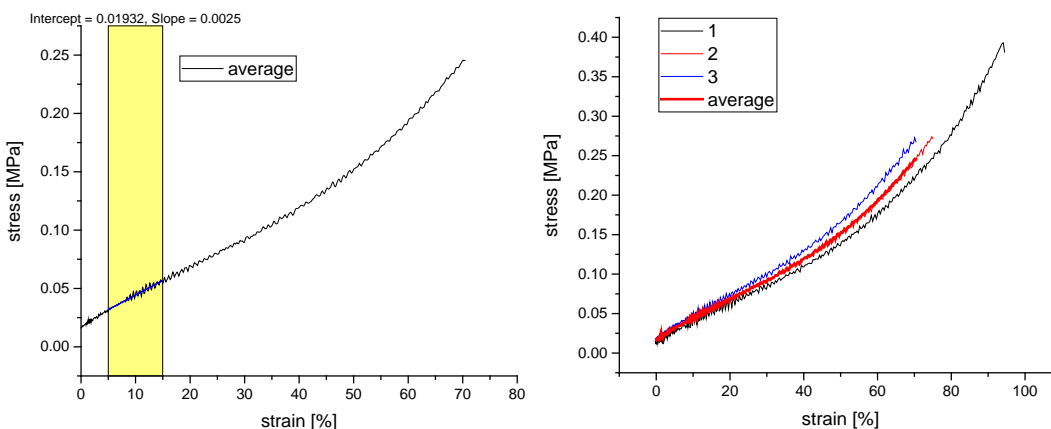

**Figure S58.** Tensile tests of **E3-CN-33**. Three independent tests were performed.

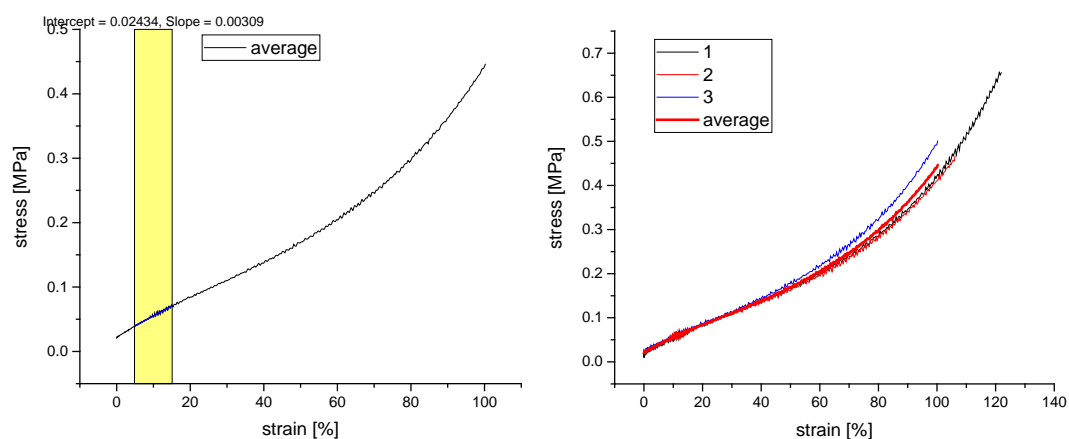

**Figure S59.** Tensile tests of **E3-CN-20**. Three independent tests were performed.

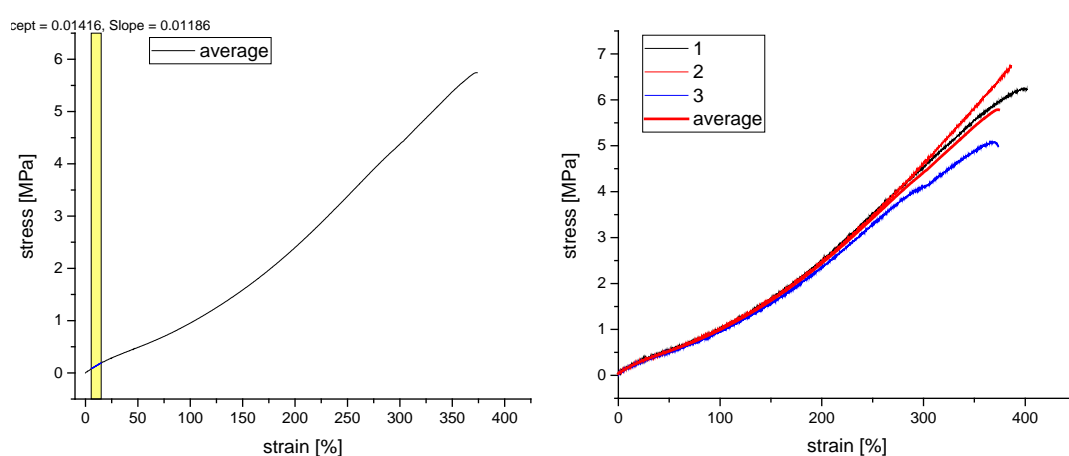

**Figure S60.** Tensile tests of **Elastasil®Film**. Three independent tests were performed.

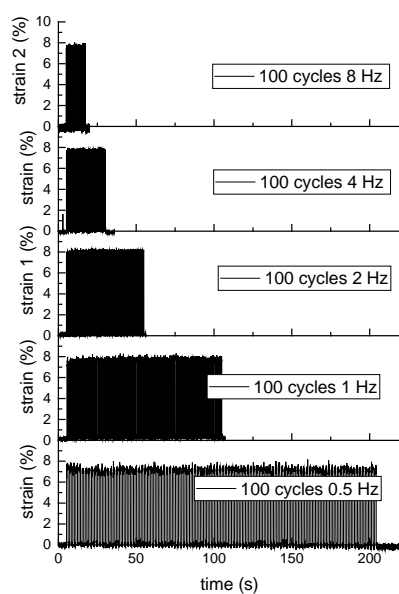

**Figure S61.** Lateral actuation strain of **Elastasil®Film** 30% prestrained measured at various frequencies (0.5-8 Hz) and an electric field of  $90 \text{ V } \mu\text{m}^{-1}$ .

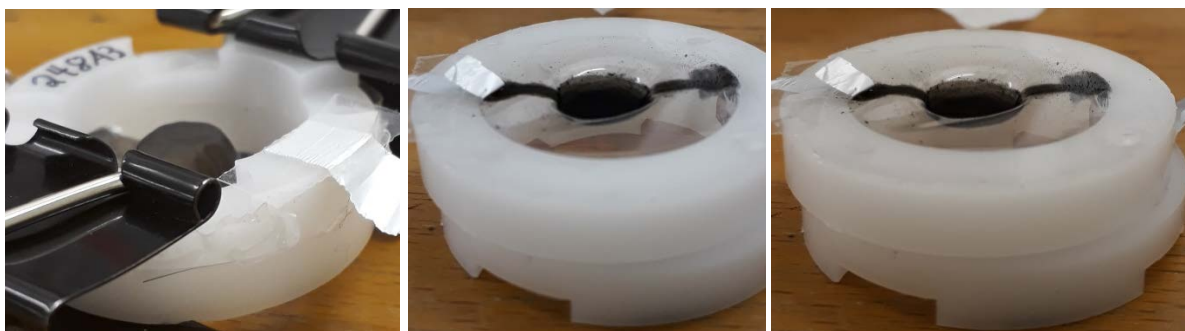

**Figure S62.** Photos showing that the actuator inflates in both directions.

Video 1. Circular membrane actuator constructed from **E3-Cl-20** operated for 100 cycles with  $53 \text{ V } \mu\text{m}^{-1}$  at 0.5 Hz. The diameter of the film is 25 mm, the electrode diameter is 8 mm. Carbon black powder was used as electrode.

Video 2. Circular membrane actuator constructed from **E3-Cl-20** operated for 1000 cycles at  $42 \text{ V } \mu\text{m}^{-1}$  at 10 Hz.

Video 3. Circular membrane actuator constructed from **E3-Cl-20** tested at different voltages. The movie was constructed by combining photos which were taken at certain time intervals.
